# Supplementary material
Source: PubMed Central journal article supplement (PMC5033825)
Supplement: jciinsight-1-86673-s001.pdf [file jciinsight-1-86673-s001.pdf]

## Supplementary tables and figures

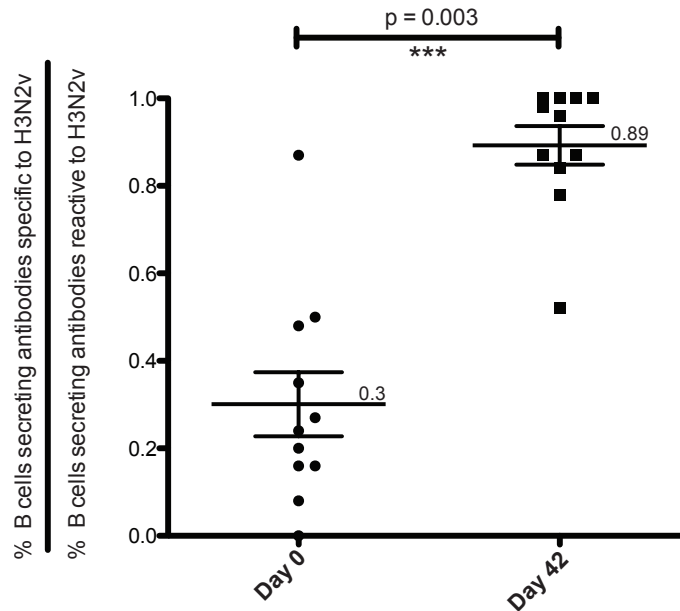

**Figure S1. Frequency of influenza A H3N2v HA-specific B cells from 11 vaccinated donors.**

PBMCs from day 0 or day 42 post-vaccination were transformed with EBV in 384-well plates and supernatants were screened by ELISA for the presence of antibodies to H3N2v A/Minnesota/11/2010 HA or HAs from two seasonal strains: A/Victoria/361/2011 or A/Wisconsin/67/2005. The graph represents data from 11 donors, showing the ratio of B cells secreting antibodies specific to H3N2v HA that did not cross-react with HA from seasonal strains to the total B cells secreting antibody reactive to H3N2v. The percentage of H3N2v specific or reactive B cells were calculated by the number of wells with ODs greater than 2 times standard deviation above background divided by total number of transformed B cells  $\times 100$ . The error bars represent standard error of means and the p value was calculated by Wilcoxon test

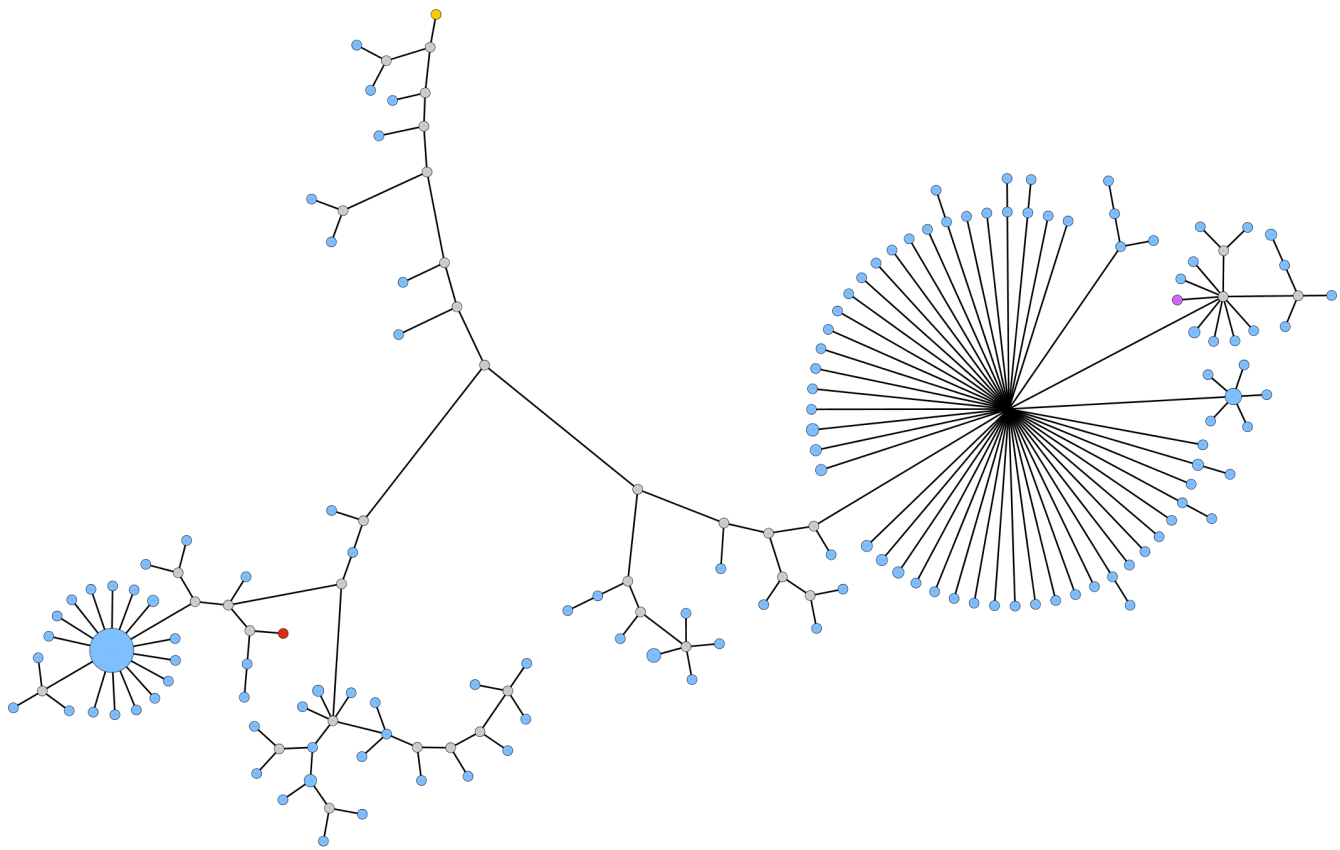

**Figure S2. Lineage network analysis for variants of H3v reactive human monoclonal antibody H3v-104 obtained from the same donor.** First, antibody heavy chain variable gene sequences were obtained from PBMCs collected on day 0, 7, or 42 after immunization, and those sharing use of the  $V_H1-69$  and  $J_H4$  gene segments that encode H3v-104 were identified. Then, CD-HIT was used to identify the HCDR3 sequences of 296 sequences that clustered within 85% identity with the HCDR3 sequence of H3v-104. We built a Phylip lineage using the alakazam and shazam packages of the Change-O software suite, and visualized the network in Cytoscape.

In the network shown, the gold node at the top of the figure represents the inferred germline sequence. Gray nodes are inferred intermediate sequences. The violet node (toward the right) represents a sequence observed via sequencing B cells from this donor at day 0 (the day of immunization). The blue nodes represent sequences observed via sequencing B cells from day 7 after immunization. The red node represents the mAb H3-v104 obtained by B cell transformation and hybridoma formation on day 42 after immunization. The size of a node represents the count of sequences observed in the data set.

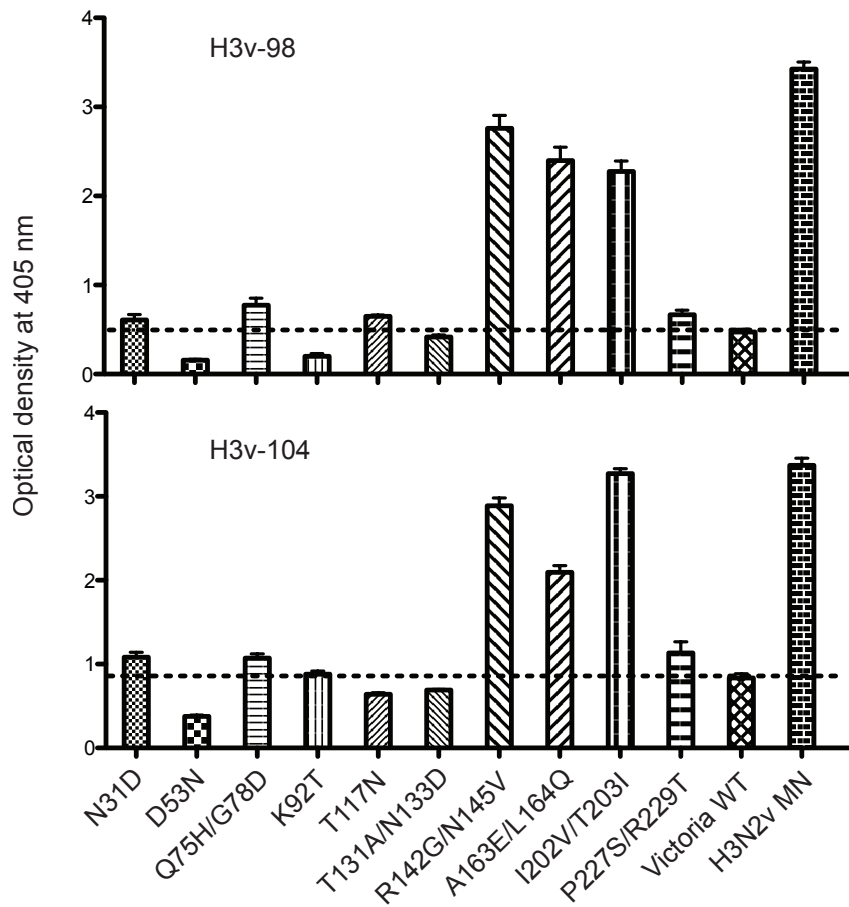

**Figure S3. Binding of H3v-specific mAbs to Victoria *wild-type* and HA mutants**

17 variant-specific polymorphisms were introduced into Victoria HA as single or double mutants. The graph shows binding optical densities (O.D.s) measured by ELISA for mAbs H3v-98 and H3v-104 with the Victoria HA mutants at antibody concentration of 10  $\mu\text{g}/\text{mL}$ . Three double-mutant HA molecules, Victoria I202V/T203I, A163E/L164Q or R142G/N144V, enhanced binding to mAbs H3v-98 and H3v-104 that otherwise did not bind to the wild-type Victoria HA. The dotted line represents the baseline level of binding to wild-type Victoria HA.

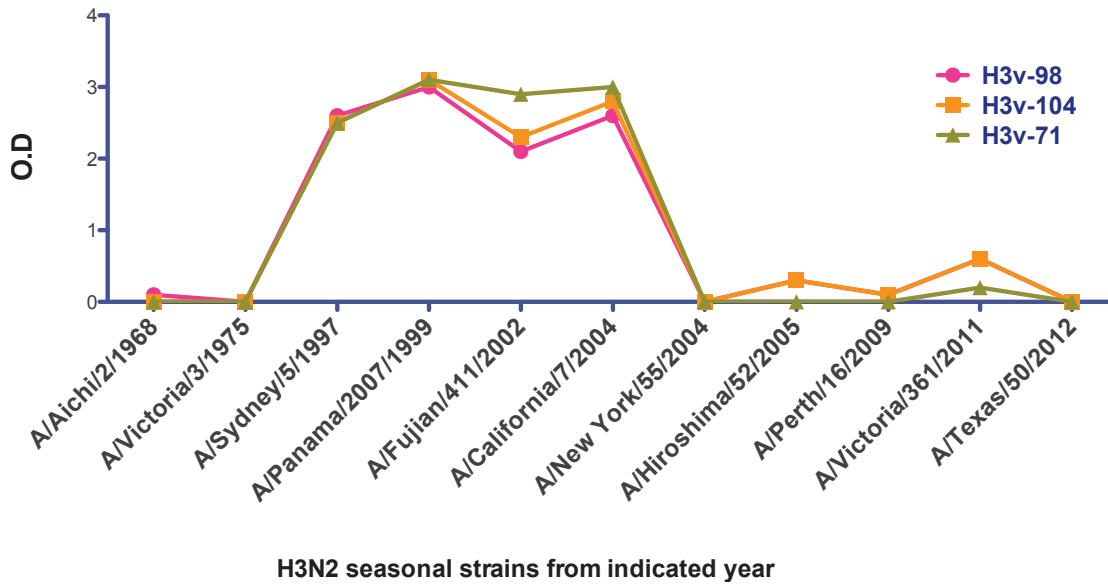

**Figure S4. Binding to HA from H3N2 seasonal strains.** The mAbs were tested for binding against HAs derived from 10 seasonal strains that circulated between 1968 to 2012 by ELISA at a single concentration of the antibody (0.3  $\mu\text{g}/\text{mL}$ ). The O.D. values for H3v-98 (pink), H3v-104 (orange) or H3v-71 (green) are indicated on the y-axis and the HA from H3N2 strains used for binding are indicated on the x-axis.

| Table S1. Neutralization titers for four H3v-reactive human mAbs against swine IAVs |                                                                       |                                             |                                              |                              |
|-------------------------------------------------------------------------------------|-----------------------------------------------------------------------|---------------------------------------------|----------------------------------------------|------------------------------|
| Monoclonal antibody                                                                 | Lowest concentration of the mAb that can neutralize the virus (µg/mL) |                                             |                                              |                              |
|                                                                                     | Cluster I<br>A/Swine/Texas/<br>4199-2/98                              | Cluster II<br>A/Swine/Colorado/<br>23619/99 | Cluster III<br>A/Swine/Oklahoma/<br>18089/99 | Cluster IV<br>A/Ohio/13/2012 |
| H3v-71                                                                              | >                                                                     | 0.12                                        | >                                            | 0.12                         |
| H3v-98                                                                              | >                                                                     | 0.31                                        | 0.16                                         | 0.16                         |
| H3v-104                                                                             | >                                                                     | 0.08                                        | 0.03                                         | 0.01                         |
| H3v-45                                                                              | >                                                                     | 0.63                                        | 10.0                                         | 1.25                         |

**Table S1. Neutralization titers for four H3v-reactive human mAbs against swine IAVs.**

H3v mAbs were tested for neutralizing activity against four H3N2 strains representing each antigenic cluster circulating in swine, A/Swine/Texas/4199-2/98 (cluster I), A/Swine/Colorado/23619/99 (cluster II), A/Swine/Oklahoma/18089/99 (cluster III) and A/Ohio/13/2012 (cluster IV). The table shows the lowest concentration of the antibody (µg/mL) that exhibited neutralizing activity against each strain. The > symbol indicates neutralization was not detected at the maximum concentration tested (10 µg/mL).

| <b>Table S2. Binding breadth for five H3v-reactive antibodies</b> |                                          |                                                    |            |           |            |           |
|-------------------------------------------------------------------|------------------------------------------|----------------------------------------------------|------------|-----------|------------|-----------|
| <b>Subtype</b>                                                    | <b>HA from IAV strains</b>               | <b>Optical density at 405 nm for indicated mAb</b> |            |           |            |           |
|                                                                   |                                          | <b>H3v-98</b>                                      | <b>104</b> | <b>71</b> | <b>126</b> | <b>81</b> |
| H3N2v                                                             | A/Minnesota/11/2010                      | 2.29                                               | 2.43       | 2.20      | 2.21       | 2.12      |
| H1N1                                                              | A/Solomon islands/03/2006                | 0.10                                               | 0.09       | 0.09      | 0.10       | 0.10      |
| H1N1                                                              | A/Texas/36/1991                          | 0.10                                               | 0.10       | 0.11      | 0.09       | 0.10      |
| H2N2                                                              | A/Japan/305/1957                         | 0.10                                               | 0.10       | 0.09      | 0.10       | 0.10      |
| H4N6                                                              | A/duck/Czechoslovakia/1956               | 0.12                                               | 0.10       | 0.10      | 0.12       | 0.11      |
| H5N1                                                              | A/Vietnam/1203/2004                      | 0.12                                               | 0.11       | 0.09      | 0.11       | 0.09      |
| H6N1                                                              | A/teal/Hong Kong/W312/1997               | 0.13                                               | 0.11       | 0.09      | 0.11       | 0.10      |
| H7N7                                                              | A/Netherlands/219/2003                   | 0.10                                               | 0.09       | 0.09      | 0.10       | 0.10      |
| H7N2                                                              | A/New York/107/2003                      | 0.09                                               | 0.10       | 0.09      | 0.09       | 0.09      |
| H7N9                                                              | A/Shanghai/2/3013                        | 0.10                                               | 0.11       | 0.09      | 0.10       | 0.10      |
| H9N2                                                              | A/chicken/HongKong/G9/1997               | 0.12                                               | 0.10       | 0.09      | 0.10       | 0.12      |
| H9N2                                                              | A/Hong Kong/1073/1999                    | 0.15                                               | 0.09       | 0.12      | 0.09       | 0.09      |
| H10N7                                                             | A/chicken/Germany/N/1949                 | 0.22                                               | 0.22       | 0.14      | 0.17       | 0.14      |
| H13N6                                                             | A/gull/Maryland/704/1977                 | 0.11                                               | 0.10       | 0.10      | 0.11       | 0.10      |
| H14N5                                                             | A/mallard duck/Astrakhan/263/1982        | 0.15                                               | 0.16       | 0.12      | 0.11       | 0.11      |
| H15N8                                                             | A/shearwater/Western Australia/2576/1979 | 0.15                                               | 0.12       | 0.09      | 0.11       | 0.10      |
| H16N3                                                             | A/black-headed gull/Sweden/4/1999        | 0.12                                               | 0.12       | 0.09      | 0.10       | 0.10      |

**Table S2. Binding of H3v-specific mAbs to HA from other subtypes.** Five H3v-specific mAbs were tested for binding against HAs derived from strains belonging to 12 other IAV subtypes by ELISA at a single concentration of the antibody (1 µg/mL). The mAbs did not show significant binding to HA molecules from other HA subtypes.

**Table S3.** Next generation sequence analysis identification of additional members of clonal lineages based on the antibody gene sequences for representative mAbs.

**Count of related sequences by time point**

| Hybridoma        | Day 0 | Day 7  | Day 21 | Day 28 | Day 42 | Total |
|------------------|-------|--------|--------|--------|--------|-------|
| Donor 41 H3v-104 | 1     | 295    | 0      | 0      | 0      | 296   |
| Donor 10 H3v-47  | 0     | 0      | 0      | 0      | 0      | 0     |
| Donor 27 H3v-126 | 0     | 0      | 0      | 0      | 0      | 0     |
| Donor 37 H3v-71  | 0     | 0      | 0      | 0      | 0      | 0     |
| Donor 37 H3v-98  | 0     | 0      | 0      | 0      | 0      | 0     |
| Donor 37 H3v-81  | 1     | 18,928 | 1      | 0      | 0      | 18930 |

**Out of indicated number of V/J gene segment matches**

| Hybridoma        | Day 0  | Day 7  | Day 21 | Day 28 | Day 42 | Total  |
|------------------|--------|--------|--------|--------|--------|--------|
| Donor 41 H3v-104 | 5,775  | 30,679 | 7,114  | 11,757 | 8,042  | 63367  |
| Donor 10 H3v-47  | 695    | 6,637  | 3,619  | 4,672  | 1,059  | 16682  |
| Donor 27 H3v-126 | 21,332 | 17,197 | 19,506 | 25,674 | 45,999 | 129708 |
| Donor 37 H3v-71  | 1,965  | 1,379  | 3,545  | 2,002  | 2,413  | 11304  |
| Donor 37 H3v-98  | 2,617  | 686    | 4,663  | 3,226  | 3,844  | 15036  |
| Donor 37 H3v-81  | 129    | 28,047 | 50     | 65     | 141    | 28432  |

**Related sequences as percent of V/J recombination event, by time point**

| Hybridoma        | Day 0 | Day 7  | Day 21 | Day 28 | Day 42 |
|------------------|-------|--------|--------|--------|--------|
| Donor 41 H3v-104 | 0.02% | 0.96%  | 0%     | 0%     | 0%     |
| Donor 10 H3v-47  | 0%    | 0%     | 0%     | 0%     | 0%     |
| Donor 27 H3v-126 | 0%    | 0%     | 0%     | 0%     | 0%     |
| Donor 37 H3v-71  | 0%    | 0%     | 0%     | 0%     | 0%     |
| Donor 37 H3v-98  | 0%    | 0%     | 0%     | 0%     | 0%     |
| Donor 37 H3v-81  | 0.78% | 67.49% | 2.00%  | 0%     | 0%     |

Table S4. Amino acid sequence alignment for members of the H3v-104 clonal lineage

|                    |   |   |   |   |   |   |   |   |   |   |   |   |   |   |   |   |   |   |   |   |   |   |   |   |   |   |   |   |   |   |   |   |   |   |   |   |   |   |   |     |   |   |   |   |   |   |   |   |   |   |   |   |   |   |   |   |   |   |   |    |    |
|--------------------|---|---|---|---|---|---|---|---|---|---|---|---|---|---|---|---|---|---|---|---|---|---|---|---|---|---|---|---|---|---|---|---|---|---|---|---|---|---|---|-----|---|---|---|---|---|---|---|---|---|---|---|---|---|---|---|---|---|---|---|----|----|
| H104               | - | S | V | K | V | S | C | R | A | S | G | G | T | L | P | T | Y | A | I | N | W | V | R | Q | A | P | G | Q | G | L | E | W | M | G | I | F | S | T | F | G   | A | A | N | Y | A | Q | K | F | Q | D | R | V | T | I | S | A | D | D | S | 59 |    |
| 13124-13108_5443_7 | A | S | V | K | V | S | C | K | A | S | G | G | T | F | R | T | Y | A | I | S | W | V | R | Q | A | P | G | Q | G | L | E | W | M | G | I | M | S | T | F | G   | S | A | N | Y | A | Q | R | F | Q | G | R | V | T | I | T | E | D | E | S | 60 |    |
| 13124-17064_7911_7 | A | S | V | K | V | S | C | K | A | S | G | G | T | F | R | T | Y | A | I | S | W | V | R | Q | A | P | G | Q | G | L | E | W | M | G | I | M | S | T | F | G   | S | A | N | Y | A | Q | R | F | Q | G | R | V | T | I | T | E | D | E | S | 60 |    |
| 13124-17408_2631_7 | A | S | V | K | V | S | C | K | A | S | G | G | T | F | R | T | Y | A | I | S | W | V | R | Q | A | P | G | Q | G | L | E | W | M | G | I | M | S | T | F | G   | S | A | N | Y | A | Q | R | F | Q | G | R | V | T | I | T | E | D | E | S | 60 |    |
| 13124-8638_3852_7  | A | S | V | K | V | S | C | K | A | S | G | G | T | F | R | T | Y | A | I | S | W | V | R | Q | A | P | G | Q | G | L | E | W | M | G | I | M | S | T | F | G   | S | A | N | Y | A | Q | R | F | Q | G | R | V | T | I | T | E | D | E | S | 60 |    |
| 13124-13096_5429_7 | A | S | V | K | V | S | C | K | A | S | G | G | T | F | R | T | Y | A | I | S | W | V | R | Q | A | P | G | Q | G | L | E | W | M | G | I | M | S | T | F | G   | S | A | N | Y | A | Q | R | F | Q | G | R | V | T | I | T | E | D | E | S | 60 |    |
| 13124-11655_2473_7 | A | S | V | K | V | S | C | K | A | S | G | G | T | F | R | T | Y | A | I | S | W | V | R | Q | A | P | G | Q | G | L | E | W | M | G | I | M | S | T | F | G   | S | A | N | Y | A | Q | R | F | Q | G | R | V | T | I | T | E | D | E | S | 60 |    |
| 13124-6426_6714_7  | A | S | V | K | V | S | C | K | A | S | G | G | T | L | P | T | Y | A | V | N | W | V | R | Q | A | P | G | Q | G | L | E | W | M | G | I | F | S | A | F | G   | S | A | N | Y | A | Q | K | F | Q | G | R | L | T | I | T | E | D | D | S | 60 |    |
| 13124-3939_25072_7 | A | S | V | K | V | S | C | K | A | S | G | G | T | F | R | T | Y | A | I | S | W | V | R | Q | A | P | G | Q | G | L | E | W | M | G | I | M | S | T | F | G   | S | A | N | Y | A | Q | R | F | Q | G | R | V | T | I | T | E | D | E | S | 60 |    |
| 13124-4626_10993_7 | A | S | V | K | V | S | C | K | A | S | G | G | T | F | R | T | Y | A | I | S | W | V | R | Q | A | P | G | Q | G | L | E | W | M | G | I | M | S | T | F | G   | S | A | N | Y | A | Q | R | F | Q | G | R | V | T | I | T | E | D | E | S | 60 |    |
| 13124-11567_8443_7 | A | S | V | K | V | S | C | K | A | S | G | G | T | F | R | T | Y | A | I | S | W | V | R | Q | A | P | G | Q | G | L | E | W | M | G | I | M | S | T | F | G   | S | A | N | Y | A | Q | R | F | Q | G | R | V | T | I | T | E | D | E | S | 60 |    |
| 13124-8121_12403_7 | A | S | V | K | V | S | C | K | A | S | G | G | T | F | R | T | Y | A | I | S | W | V | R | Q | A | P | G | Q | G | L | E | W | M | G | I | M | S | T | F | G   | S | A | N | Y | A | Q | R | F | Q | G | R | V | T | I | T | E | D | E | S | 60 |    |
| 13124-7044_12701_7 | A | S | V | K | V | S | C | K | A | S | G | G | T | F | R | T | Y | A | I | S | W | V | R | Q | A | P | G | Q | G | L | E | W | M | G | I | M | S | T | F | G   | S | A | N | Y | A | Q | R | F | Q | G | R | V | T | I | T | E | D | E | S | 60 |    |
| 13124-8117_15788_7 | A | S | V | K | V | S | C | K | A | S | G | G | T | F | R | T | Y | A | I | S | W | V | R | Q | A | P | G | Q | G | L | E | W | M | G | I | M | S | T | F | G   | S | A | N | Y | A | Q | R | F | Q | G | R | V | T | I | T | E | D | E | S | 60 |    |
| 13124-7893_13223_7 | A | S | V | K | V | S | C | K | A | S | G | G | T | F | R | T | Y | A | I | S | W | V | R | Q | A | P | G | Q | G | L | E | W | M | G | I | M | S | T | F | G   | S | A | N | Y | A | Q | R | F | Q | G | R | V | T | I | T | E | D | E | S | 60 |    |
| 13124-3158_15786_7 | A | S | V | K | V | S | C | K | A | S | G | G | T | F | R | T | Y | A | I | S | W | V | R | Q | A | P | G | Q | G | L | E | W | M | G | I | M | S | T | F | G   | S | A | N | Y | A | Q | R | F | Q | G | R | V | T | I | T | E | D | E | S | 60 |    |
| 13124-8815_14788_7 | A | S | V | K | V | S | C | K | A | S | G | G | T | F | R | T | Y | A | I | S | W | V | R | Q | A | P | G | Q | G | L | E | W | M | G | I | M | S | T | F | G   | S | A | N | Y | A | Q | R | F | Q | G | R | V | T | I | T | E | D | E | S | 60 |    |
| 13124-2327_12778_7 | A | S | V | K | V | S | C | K | A | S | G | G | T | F | R | T | Y | A | I | S | W | V | R | Q | A | P | G | Q | G | L | E | W | M | G | I | M | S | T | F | G   | S | A | N | Y | A | Q | R | F | Q | G | R | V | T | I | T | E | D | E | S | 60 |    |
| 13124-8105_15803_7 | A | S | V | K | V | S | C | K | A | S | G | G | T | F | R | T | Y | A | I | S | W | V | R | Q | A | P | G | Q | G | L | E | W | M | G | I | M | S | T | F | G   | S | A | N | Y | A | Q | R | F | Q | G | R | V | T | I | T | E | D | E | S | 60 |    |
| 13124-9291_18407_7 | A | S | V | K | V | S | C | K | A | S | G | G | T | F | R | T | Y | A | I | S | W | V | R | Q | A | P | G | Q | G | L | E | W | M | G | I | M | S | T | F | G   | S | A | N | Y | A | Q | R | F | Q | G | R | V | T | I | T | E | D | E | S | 60 |    |
| 13124-9311_18403_7 | A | S | V | K | V | S | C | K | A | S | G | G | T | F | R | T | Y | A | I | S | W | V | R | Q | A | P | G | Q | G | L | E | W | M | G | I | M | S | T | F | G   | S | A | N | Y | A | Q | R | F | Q | G | R | V | T | I | T | E | D | E | S | 60 |    |
| 13124-6719_23710_7 | A | S | V | K | V | S | C | K | A | S | G | G | T | F | R | T | Y | A | I | N | W | V | R | Q | A | P | G | Q | G | L | E | W | M | G | V | I | M | S | T | F   | G | P | T | N | Y | A | Q | R | F | Q | G | R | L | T | I | T | E | D | D | S  | 60 |
| 13124-5057_16929_7 | A | S | V | K | V | S | C | K | A | S | G | G | T | F | R | T | Y | A | I | S | W | V | R | Q | A | P | G | Q | G | L | E | W | M | G | I | M | S | T | F | G   | S | A | N | Y | A | Q | R | F | Q | G | R | V | T | I | T | E | D | E | S | 60 |    |
| 13124-0447_20106_7 | A | S | V | K | V | S | C | K | A | S | G | G | T | F | R | T | Y | A | I | S | W | V | R | Q | A | P | G | Q | G | L | E | W | M | G | I | M | S | T | F | G   | S | A | N | Y | A | Q | R | F | Q | G | R | V | T | I | T | E | D | E | S | 60 |    |
| 13124-9291_18407_7 | A | S | V | K | V | S | C | K | A | S | G | G | T | F | R | T | Y | A | I | S | W | V | R | Q | A | P | G | Q | G | L | E | W | M | G | I | M | S | T | F | G   | S | A | N | Y | A | Q | R | F | Q | G | R | V | T | I | T | E | D | E | S | 60 |    |
| 13124-6421_16382_7 | A | S | V | K | V | S | C | K | A | S | G | G | T | F | R | T | Y | A | I | S | W | V | R | Q | A | P | G | Q | G | L | E | W | M | G | I | M | S | T | F | G   | S | A | N | Y | A | Q | R | F | Q | G | R | V | T | I | T | E | D | E | S | 60 |    |
| 13124-0445_20088_7 | A | S | V | K | V | S | C | K | A | S | G | G | T | F | R | T | Y | A | I | S | W | V | R | Q | A | P | G | Q | G | L | E | W | M | G | I | M | S | T | F | G   | S | A | N | Y | A | Q | R | F | Q | G | R | V | T | I | T | E | D | E | S | 60 |    |
| 13124-9924_23840_7 | A | S | V | K | V | S | C | K | A | S | G | G | T | L | P | T | Y | A | V | N | W | V | R | Q | A | P | G | Q | G | L | E | W | M | G | I | F | S | T | F | G   | S | A | N | Y | A | Q | K | F | Q | G | R | L | T | I | T | E | D | D | S | 60 |    |
| 13124-9837_20019_7 | - | S | V | K | V | S | C | K | A | S | G | G | T | F | R | T | Y | A | I | S | W | V | R | Q | A | P | G | Q | G | L | E | W | M | G | I | M | S | T | F | G   | S | A | N | Y | A | Q | R | F | Q | G | R | V | T | I | T | E | D | E | S | 59 |    |
| 13124-6959_21421_7 | A | S | V | K | V | S | C | K | A | S | G | G | T | F | R | T | Y | A | I | S | W | V | R | Q | A | P | G | Q | G | L | E | W | M | G | I | M | S | T | F | G   | S | A | N | Y | A | Q | R | F | Q | G | R | V | T | I | T | E | D | E | S | 60 |    |
| 13124-8236_14734_7 | A | S | V | K | V | S | C | K | A | S | G | G | T | F | R | T | Y | A | I | S | W | V | R | Q | A | P | G | Q | G | L | E | W | M | G | I | M | S | T | F | G</ |   |   |   |   |   |   |   |   |   |   |   |   |   |   |   |   |   |   |   |    |    |



13124-11897\_8962\_7 ASVKVSCKASGGT**L**TTYA INWVRQAPGGGLEWMGGI**F**STFGA**A**NYAQ**K**FQGRVIT**A**DD**S** 60  
13124-4170\_11198\_7 ASVKVSCKASGGTFRTYA I**G**WVRQAPGGGLEWMGGI**M**STFGS**A**NYAQ**R**FQGRVIT**E**DES 60  
13124-7859\_11814\_7 ASVKVSCKASGGT**F**DKS**A**I**I**WVRQAPGGGL**D**WMGGI**V**PI**F**GT**A**TYAQ**K**FQGRVIT**A**DES 60  
13124-2848\_20542\_7 ASVKVSCKASGGT**L**PTYA**V**NWVRQAPGGGLEWMGGI**F**STFGS**A**NYAQ**K**FQGR**L**IT**E**DES 60  
13124-0540\_24508\_7 ASVKVSCKASGGT**L**PTYA**V**NWVRQAPGGGLEWMGGI**F**STFGS**A**NYAQ**K**FQGR**L**IT**E**DES 60  
13124-4107\_12327\_7 ASVKVSCKASGGTFRTYA I**S**WVRQAPGGGLEWMGGI**M**STFGS**A**NYAQ**R**FQGRVIT**E**DES 60  
13124-9359\_11629\_7 ASVKVSCKASGGTFRTYA I**G**WVRQAPGGGLEWMGGI**M**STFGS**A**NYAQ**R**FQGRVIT**E**DES 60  
13124-4870\_23583\_7 ASVKVSCKASGGTFRTYA I**S**WVRQAPGGGLEWMGGI**M**STFGS**A**NYAQ**R**FQGRVIT**E**DES 60  
13124-4078\_18346\_7 ASVKVSCKASGGTFRTYA I**S**WVRQAPGGGLEWMGGI**M**STFGS**A**NYAQ**R**FQGRVIT**E**DES 60  
13124-9614\_9960\_7 ASVKVSCKASGGTFRTYA I**S**WVRQAPGGGLEWMGGI**M**STFGS**A**NY**E**Q**R**FQGRVIT**E**DES 60  
13124-2552\_10161\_7 ASVKVSCKASGGTFRTYA I**S**WVRQAPGGGLEWMGGI**M**STFGS**A**NYAQ**R**FQGRVIT**E**DES 60  
13124-11041\_6747\_7 ASVKVSCKASGGTFRTYA I**S**WVRQAPGGGLEWMGGI**M**STFGS**V**NYAQ**R**FQGRVIT**E**DES 60  
13124-8185\_18147\_7 ASVKVSCKASGGTFRTYA I**S**WVRQAPGGGLEWMGGI**M**STFGS**A**NYAQ**R**FQGRVIT**E**DES 60  
13124-8027\_13180\_7 ASVKVSCKASGG**D****L**PTYA I**N**WVRQAPGGGLEWMGGI**F**STFG**A**NYAQ**K**FQGRVIT**S**AD**S** 60  
13124-4111\_9790\_7 ASVKVSCKASGGTFRTYA I**S**WVRQAPGGGLEWMGGI**M**STFGS**A**NYAQ**R**FQGRVIT**E**DES 60  
13124-4128\_9784\_7 ASVKVSCKASGGTFRTYA I**S**WVRQAPGGGLEWMGGI**M**STFGS**A**NYAQ**R**FQGRVIT**E**DES 60  
13124-2862\_22915\_7 ASVKVSCKASGGTFRTYA I**S**WVRQAPGGGLEWMGGI**M**STFGS**A**NYAQ**R**FQGRVIT**E**DES 60  
13124-14791\_9711\_7 ASVKVSCKASGGTFRTYA I**S**WVRQAPGGGLEWMGGI**M**STFGS**A**NYAQ**R**FQGRVIT**E**DES 60  
13124-5213\_15196\_7 ASVKVSCKASGGTFRTYA I**S**WVRQAPGGGLEWMGGI**M**STFGS**A**NYAQ**R**FQGRVIT**E**DES 60  
13124-2079\_15900\_7 ASVKVSCKASGGTFRTYA I**S**WVRQAPGGGLEWMGGI**M**STFGS**A**NYAQ**R**FQGRVIT**E**DES 60  
13124-13540\_4548\_7 ASVKVSCKASGGT**L**PTYA**V**NWVRQAPGGGLEWMGGI**F**ST**L**GS**A**NYAQ**K**FQGR**L**IT**E**DES 60  
13124-2382\_16449\_7 ASVKVSCKASGGTFRTYA I**S**WVRQAPGGGLEWMGGI**M**STFGS**A**NYAQ**R**C**Q**GRVIT**E**DES 60  
13124-4993\_22878\_7 -**S**VKVSCKASGGTFRTYA I**S**WVRQAPGGGLEWMGGI**M**STFGS**A**NYAQ**R**FQGRVIT**E**DES 59  
13124-4437\_23388\_7 ASVKVSCKASGGTFRTYA I**S**WVRQAPGGGLEWMGGI**M**STFGS**A**NYAQ**R**FQGRVIT**E**DES 60  
13124-8008\_13185\_7 ASVKVSCKASGG**D****L**PTYA I**N**WVRQAPGGGLEWMGGI**F**STFG**A**NYAQ**K**FQGRVIT**S**AD**S** 60  
13124-7376\_16321\_7 ASVKVSCKASGGTFRTYA I**S**WVRQAPGGGLEWMGGI**M**STFGS**A**NYAQ**R**FQGRVIT**E**DES 60  
13124-3709\_19439\_7 ASVKVSCKASGGT**L**TTYA I**N**WVRQAPGGGLEWMGGI**F**STFG**A**NYAQ**K**FQ**D**RVIT**A**DD**S** 60  
13124-4765\_15700\_7 **G****L****M**KVSCKASGGTFRTYA I**S**WVRQAPGGGLEWMGGI**M**STFGS**A**NYAQ**R**FQGRVIT**E**DES 60  
13124-9639\_24880\_7 ASVKVSCKASGGTFRTYA I**S**WVRQAPGGGLEWMGGI**M**STFGS**A**NYAQ**R**FQGRVIT**E**DES 60  
13124-8292\_21235\_7 ASVKVSCKASGGTFRTYA I**S**WVRQAPGGGLEWMGGI**M**STFGS**A**NYAQ**R**FQGRVIT**E**DES 60  
13124-9713\_21352\_7 ASVKVSCKASG**Y****T****F****T****G****D****N****M****H**WVRQAPGGGLEWMGGI**M**STFGS**A**NYAQ**R**FQGRVIT**E**DES 60  
13124-9427\_20019\_7 ASVKVSCKASGGTFRTYA I**S**WVRQAPGGGLEWMGGI**M**STFGS**A**NYAQ**R**FQGRVIT**E**DES 60  
13124-5040\_16938\_7 ASVKVSCKASGGTFRTYA I**S**WVRQAPGGGLEWMGGI**M**STFGS**A**NYAQ**R**FQGRVIT**E**DES 60  
13124-8347\_21942\_7 ASVKVSCKASGGT**L**PTYA**V**NWVRQAPGGGLEWMGGI**F**STFGS**A**NYAQ**K**FQGR**L**IT**E**DES 60  
13124-5777\_22947\_7 ASVKVSCKASGGT**L**PTYA**V**NWVRQAPGGGLEWMGGI**F**STFGS**A**NYAQ**K**FQGR**L**IT**E**DES 60  
13124-4397\_9065\_7 ASVKVSCKASGGT**L**PTYA**V**NWVRQAPGGGLEWMGGI**F**STFGS**A**NYAQ**K**FQGR**L**IT**E**DES 60  
13124-3931\_10267\_7 ASVKVSCKASGGTFRTYA I**S**WVRQAPGGGLEWMGGI**M**STFGS**A**NYAQ**R**FQGRVIT**E**DES 60  
13124-5777\_18414\_7 ASVKVSCKASGGT**L**PTYA**V**NWVRQAPGGGLEWMGGI**F**STFGS**A**NYAQ**K**FQGR**L**IT**E**DES 60  
13124-2961\_10599\_7 ASVKVSCKASGGT**F**STYA I**I**WVRQAPGGGLEW**I**GGI**I**PI**F**GT**A**NYAQ**R**FQGRVIT**E**DES 60  
13124-4833\_13428\_7 ASVKVSCKASGGTFRTYA I**S**WVRQAPGGGLEWMGGI**M**STFGS**A**NYAQ**R**FQGRVIT**E**DES 60  
13124-7290\_10049\_7 ASVKVSCKASGGTFRTYA I**S**WVRQAPGGGLEWMGGI**M**STFGS**A**NYAQ**R**FQGRVIT**E**DES 60  
13124-10984\_7775\_7 ASVKVSCKASGGTFRTYA I**S**WVRQAPGGGLEWMGGI**M**STFGS**A**NYAQ**R**FQGRVIT**E**DES 60  
13124-5676\_10490\_7 ASVKVSCKASGGTFRTYA I**S**WVRQAPGG**R**LEWMGGI**M**S**A**FGS**A**NYAQ**R**FQGRVIT**E**DES 60  
13124-4431\_19862\_7 ASVKVSCKASGGTFRTYA I**S**WVRQAPGGGLEWMGGI**M**STFGS**A**NYAQ**R**FQGRVIT**E**DES 60  
13124-8438\_21841\_7 ASVKVSCKASGGT**L**PTYA**V**NWVRQAPGGGLEWMGGI**F**STFGS**A**NYAQ**K**FQGR**L**IT**E**DES 60  
13124-4798\_9013\_7 -**S**VKVSCKASGGTFRTYA I**S**WVRQAPGGGLEWMGGI**M**STFGS**A**NYAQ**R**FQGRVIT**E**DES 59  
13124-13204\_9680\_7 -**S**VKVSCKASGGTFRTYA I**S**WVRQAPGGGLEWMGGI**M**STFGS**A**NYAQ**R**FQGRVIT**E**DES 59  
13124-12757\_5026\_7 ASVKVSCKASGGT**L**PTYA**V**NWVRQAPGGGLEWMGGI**F**ST**F**D**S**ANYAQ**K**FQGR**L**IT**E**DES 60  
13124-13220\_9689\_7 -**S**VKVSCKASGGTFRTYA I**S**WVRQAPGGGLEWMGGI**M**STFGS**A**NYAQ**R**FQGRVIT**E**DES 59  
13124-7770\_14522\_7 ASVKVSCKASGGTFRTYA I**S**WVRQAPGGGLEWMGGI**M**STFGS**A**NYAQ**R**FQGRVIT**E**DES 60  
13124-7560\_16450\_7 ASVKVSCKASGGTFRTYA I**S**WVRQAPGGGLEWMGGI**M**STFGS**A**NYAQ**R**FQGRVIT**E**DES 60  
13124-4447\_14799\_7 ASVKVSCKASGGT**L**TTYA I**N**WVRQAPGGGLEWMGGI**F**STFG**A**NYAQ**K**FQGRVIT**A**DD**S** 60  
13124-7855\_8304\_7 ASVKVSCKASG**D**TFRTYA I**N**WVRQAPGGGLEWMGGI**M**STFG**P**P**S**YA**R**FQGRVIT**A**DES 60  
13124-8448\_21825\_7 ASVKVSCKASGGT**L**PTYA**V**NWVRQAPGGGLEWMGGI**F**STFGS**A**NYAQ**K**FQGR**L**IT**E**DES 60  
13124-9376\_12733\_7 **A****L****V**KVSCKASGGTFRTYA I**S**WVRQAPGGGLEWMGGI**M**STFGS**A**NYAQ**R**FQGRVIT**E**DES 60  
13124-0561\_12859\_7 ASVKVSCKASGGT**L**PTYA**V**NWVRQAPGGGLEWMGGI**F**STFGS**A**NYAQ**K**FQGR**L**IT**E**DES 60  
13124-18447\_9188\_7 ASVKVSCKASGGTFRTYA I**S**WVRQAPGGGLEWMGGI**M**STFGS**A**NYAQ**R**FQGRVIT**E**DES 60  
13124-3651\_15165\_7 ASVKVSCKASGGT**L**TTYA I**N**WVRQAPGGGLEWMGGI**T****F**STFG**A**NYAQ**K**FQGS**V**IT**A**DD**S** 60  
13124-8913\_15798\_7 ASVKVSCKASGGT**L**PTYA**V**NWVRQAPGGGLEWMGGI**F**STFGS**A**NYAQ**K**FQGR**L**IT**E**DES 60  
13124-4025\_16095\_7 ASVKVSCKASGGT**F**SKS**A**I**I**WVRQAPGG**R**LEWMGGI**V**PI**F**GT**A**NYAQ**K**FQGRVIT**A**DES 60  
13124-5309\_16512\_7 ASVKVSCKASGGT**L**PTYA**V**NWVRQAPGGGLEWMGGI**F**STFGS**A**NYAQ**K**FQGR**L**IT**E**DES 60  
13124-3780\_18957\_7 ASVKVSCKASGGT**L**PTYA**V**N**L**RQAPGGGLEWMGGI**F**STFGS**A**NYAQ**K**FQGR**L**IT**E**DES 60  
13124-1006\_19809\_7 ASVKVSCKASGGTFRTYA I**S**WVRQAPGGGLEWMGGI**M**STFGS**A**NYAQ**R**FQGRVIT**E**DES 60  
13124-6574\_14673\_7 ASVKVSCKASGGTFRTYA I**S**WVRQAPGGGLEWMGGI**M**STFGS**A**NYAQ**G**FQGRVIT**E**DES 60  
13124-0469\_13993\_7 ASVKVSCKASGGTFRTYA I**S**WVRQAPGGGLEWMGGI**M**STFGS**A**NYAQ**R**FQGRVIT**E**DES 60  
13124-2633\_17804\_7 ASVKVSCKASGGT**L**PTYA**V**NWVRQAPGGGLEWMGGI**F**STFGS**A**NYAQ**K**FQGR**L**IT**E**DES 60  
13124-5230\_13315\_7 -**S**VKVSCKASGGTFRTYA I**S**WVRQA**T**GQGLEWMGGI**M**STFGS**A**NYAQ**R**FQGRVIT**E**DES 59  
13124-6595\_14658\_7 ASVKVSCKASGGTFRTYA I**S**WVRQAPGGGLEWMGGI**M**STFGS**A**NYAQ**G**FQGRVIT**E**DES 60  
13124-3611\_18936\_7 ASVKVSCKASGGTFRTYA I**S**WVRQAPGGGLEWMGGI**M**STFGS**A**NYAQ**R**FQGRVIT**E**DES 60  
13124-8388\_23214\_7 ASVKVSCKASGGTFRTYA I**S**WVRQAPGGGLEWMGGI**M**STFGS**A**NYAQ**R**FQGRVIT**E**DES 60  
13124-1740\_10157\_7 ASVKVSCKASGGTFRTYA I**S**WVRQAPGGGLEWMGGI**M**STFGS**A**NYAQ**R**FQGRVIT**E**DES 60  
13124-9729\_17599\_7 ASVKVSCKASGGT**L**PTYA**V**NWVRQAPGGGLEWMGGI**F**STFGS**A**NYAQ**K**FQGR**L**IT**E**DES 60  
13124-5134\_17304\_7 ASVKVSCKASGGT**L**TTYA I**N**WVRQAPGGGLEWMGGI**F**STFG**A**NYAQ**K**FQGRVIT**A**DD**S** 60  
13124-0984\_22407\_7 ASVKVSCKASGGT**L**PTYA**V**NWVRQAPGGGLEWMGGI**F**STFGS**A**NYAQ**K**FQGR**L**IT**E**DES 60  
13124-4171\_16525\_7 ASVKVSCKASGGTFRTYA I**S****G**RQAPGGGLEWMGGI**M**STFGS**A**NYAQ**R**FQGRVIT**E**DES 60  
13124-6490\_17643\_7 ASV**N**VSCKASG**D**TFRTYA I**N**WVR**R**APGGGLEWMGGI**M**STFG**P**P**S**YA**R**FQGRVIT**A**DES 60

13124-8992\_15884\_7 ASVKVSCKASGGT**LT**TYA INWVRQAPGGGLEWMGGI**F**STFGA**A**NYAQ**K**FQGRVIT**A**D**D**S 60  
13124-3212\_15270\_7 ASVKVSCKASGGTFR**TYA** ISWVRQAPGGGLEWMGGI**M**STFGS**A**NYAQR**F**QGRVIT**E**DES 60  
13124-3308\_14663\_7 ASVKVSCKASGGTFR**TYA** ISWVRQAPGGGLEW**T**GGI**M**STFGS**A**NYAQR**F**QGRVIT**E**DES 60  
13124-0627\_16815\_7 ASVKVSC**K**T**S**GGT**VNS**FGI SWVRQAPGGGLEWMGGI**M**STFGS**A**NYAQR**F**QGRVIT**E**DES 60  
13124-0069\_17021\_7 ASVKVSCKASGGT**LPT**YA **VN**WVRQAPGGGLEWMGGI**F**STFG**A**NYAQ**K**FQGR**L**IT**E**D**S** 60  
13124-5431\_14383\_7 ASVKVSCKASGGTFR**TYA** ISWVRQAPGGGLEWMGGI**M**STFGS**A**NYAQR**F**QGRVIT**E**DES 60  
13124-2788\_17401\_7 ASVKVSCKASGGTFR**TYA** ISW**M**RQAPGG**F**EWMGGI**M**STFGS**A**NYAQR**F**QGRVIT**E**DES 60  
13124-13091\_7899\_7 ASVKVSCKASGGTFR**TYA** ISWVRQAPGGGLEWMGGI**M**STFGS**A**NYAQR**F**QGRVIT**E**DES 60  
13124-7844\_12713\_7 ASVKVSCKASGGTFR**TYA** ISWVRQA**S**GGGLEWMGGI**M**STFGS**A**NYAQR**F**QGRVIT**E**DES 60  
13124-9626\_17094\_7 ASVKVSCKASGGTFR**TYA** ISWVRQAPGGGLEWMGGI**M**STFGS**A**NYAQR**F**QGRVIT**E**DES 60  
13124-4257\_18254\_7 **GP**VKVSCKASGGT**LT**TYA INWVRQAPGGGLEWMGGI**F**ST**L**G**A**NYAQ**K**FQGRVIT**A**D**D**S 60  
13124-2825\_14799\_7 ASVKVSCKASGGTFR**TYA** ISWVRQAPGGGLEWMGGI**M**STFGS**A**NYAQR**F**QGRVIT**E**DES 60  
13124-9341\_15546\_7 ASVKVSCKASGGTFR**TYA** ISWVRQAPGGGLEWMGGI**M**STFGS**A**NYAQR**F**QGRVIT**E**DES 60  
13124\_5533\_6283\_7 ASVKVSCKASGGT**LT**TYA INWVRQAPGGGLEWMGGI**F**STFG**A**NYAQ**K**FQGRVIT**A**D**D**S 60  
13124-13282\_9736\_7 ASVKVSCKASGGTFR**TYA** ISWVRQAPGGGLEWMGGI**M**STFGS**A**NYAQR**F**QGRVIT**E**DES 60  
13124-2363\_16799\_7 ASVKVSCKASGGTFR**TYA** ISWVRQAPGGGLEWMGGI**M**STFGS**A**NYAQR**F**QGRVIT**E**DES 60  
13124-6005\_15313\_7 ASVKVSCKASGGTFR**TYA** ISWVRQAPGGGLEWMGGI**M**STFGS**A**NYAQR**F**QGRVIT**E**DES 60  
13124\_9318\_3741\_7 ASVKVSCKASG**D**TFR**TYA** INWVRQAPGGGLEWMGGI**M**STFG**P**P**S**YAQR**F**QGRVIT**A**D**S** 60  
13124-6621\_21899\_7 ASVKVSCKASGGTFR**TYA** ISWVRQAPGGGLEWMGGI**M**STFGS**A**NYAQR**F**QGRVIT**E**DES 60  
13124-5600\_22783\_7 ASVKVSCKASGGT**LT**TYA INWVRQAPGGGLEWMGGI**F**STFG**A**NYAQ**K**FQ**D**RVIT**A**D**D**S 60  
13124-2369\_18623\_7 ASVKVSCKASGGTFR**TYA** ISWVRQAPGGGLEWMGGI**M**STFGS**A**NYAQR**F**QGRVIT**E**DES 60  
13124-11115\_8100\_7 ASVKVSCKASGGTFR**TYA** ISWVRQAPGGGLEWMGGI**M**STFGS**A**NYAQR**F**QGRVIT**E**DES 60  
13124-5412\_14379\_7 ASVKVSCKASGGTFR**TYA** ISWVRQAPGGGLEWMGGI**M**STFGS**A**NYAQR**F**QGRVIT**E**DES 60  
13124-3393\_15271\_7 ASVKVSCKASGGT**LPT**YA **VN**WVRQAPGGGLEWMGGI**F**STFG**A**NYAQ**K**FQGR**L**IT**E**D**S** 60  
13124-5261\_22336\_7 ASVKVSCKASGGTFR**TYA** ISWVRQAPGGGLEWMGGI**M**STFGS**A**NYAQR**F**QGRVIT**E**DES 60  
13124-6633\_21883\_7 ASVKVSCKASGGTFR**TYA** ISWVRQAPGGGLEWMGGI**M**STFGS**A**NYAQR**F**QGRVIT**E**DES 60  
13124-3864\_23299\_7 ASVKVSCKASGG**I****F**S**R**S**A** ISWVRQAPGGGLEWMGGI**V**P**I****F**G**T**T**D**YA**Q**K**F**QGRVIT**E**DES 60  
13124-15325\_2660\_7 ASVKVSCKASGGTFR**TYA** ISWVRQAPGGGLEWMGGI**M**STFGS**A**NYAQR**F**QGRVIT**E**DES 60  
13124-5953\_20855\_7 ASVKVSCKASGGTFR**TYA** ISWVRQAPGGGLEWMGGI**M**STFGS**A**NYAQR**F**QGRVIT**E**DES 60  
13124-1994\_10960\_7 ASVKVSCKASGGT**LPT**YA **VN**WVRQAPGGGLEWMGGI**F**STFG**A**NYAQ**K**FQGR**L**IT**E**D**S** 60  
13124-14093\_8682\_7 ASVKVSCKASGGTFR**TYA** ISWVRQAPGGGLEWMGGI**M**STFGS**A**NYAQR**F**QGRVIT**E**DES 60  
13124-6875\_19742\_7 AS**L**KVSCKASGGT**LT**TYA INWVRQAPGGGLEWMGGI**F**STFG**A**NYAQ**K**FQGRVIT**A**D**D**S 60  
13124-0152\_20100\_7 ASVKVSCKASGGTFR**TYA** ISWVRQAPGGGLEWMGGI**M**STFGS**A**NYAQR**F**QGRVIT**E**DES 60  
13124\_7427\_9819\_7 ASVKVSCKASG**D**TFR**TYA** INWVRQAPGGGLEWMGGI**M**STFG**P**P**S**YAQR**F**QGRVIT**A**D**S** 60  
13124-1170\_11174\_7 ASVKVSCKASGGTFR**TYA** ISWVRQAPGGGLEWMGGI**M**STFGS**A**NYAQR**F**QGRVIT**E**DES 60  
13124-0112\_10007\_7 - SVKVSCKASGGT**LT**TYA INWVRQAPGGGLEWMGGI**F**STFG**A**NYAQ**K**FQGRVIT**A**D**D**S 59  
13124-0644\_22215\_7 ASVKVSCKASGGT**LPT**YA **VN**WVRQAPGGGLEWMGGI**F**STFGS**A**NYAQ**K**FQGR**L**IT**E**D**S** 60  
13124-10680\_5800\_7 ASVKVSCKASGGT**LPT**YA **VN**WVRQAPGGGLEWMGGI**F**STFGS**A**NYAQ**K**FQGR**L**IT**E**D**S** 60  
13124-1335\_12762\_7 ASVKVSCKASGGTFR**TYA** ISWVRQAPGGGLEWMGGI**M**STFGS**A**NYAQR**F**QGRVIT**E**DES 60  
13124-6480\_14906\_7 ASVKVSCKASGGTFR**TYA** ISWVRQAPGGGLEWMGGI**M**STFGS**A**NYAQR**F**QGRVIT**E**DES 60  
13124-9619\_15184\_7 ASVKVSCKASGGT**LPT**YA **VN**WVRQAPGGGLEWMGGI**F**STFGS**A**NYAQ**K**FQGR**L**IT**E**D**S** 60  
13124-8510\_23327\_7 ASVKVSCKASGGTFR**TYA** ISWVRQAPGGGLEWMGGI**M**STFGS**A**NYAQR**F**QGRVIT**E**DES 60  
13124-7637\_10676\_7 ASVKVSCKASGGTFR**TYA** ISWVRQAPGGGLEWMGGI**M**STFGS**A**NYAQR**F**QGRVIT**E**DES 60  
13124-9005\_19868\_7 ASVKVSCKASGGTFR**TYA** ISWVRQAPGGGLEWMGGI**M**STFGS**A**NYAQR**F**QGRVIT**E**DES 60  
13124-6121\_19672\_7 ASVKVSCKASGGTFR**TYA** ISWVRQAPGGGLEWMGGI**M**STFGS**A**NYAQR**F**QGRVIT**E**DES 60  
13124-3435\_11203\_7 ASVKVSCKASGGTFR**TYA** ISWVRQAPGGGLEWMGGI**M**STFGS**A**NYAQR**F**QGRVIT**E**DES 60  
13124\_6582\_9947\_7 ASVKVSCKASGGTFR**TYA** ISWVRQAPGGGLEWMGGI**M**STFGS**A**NYAQR**F**QGRVIT**E**DES 60  
13124-6431\_22711\_7 ASVKVSCKASGGT**LPT**YA **VN**WVRQAPGGGLEWMGGI**F**STFGS**A**NYAQ**K**FQGR**L**IT**E**D**S** 60  
13124-1655\_14573\_7 ASVKVSCKASGGTFR**TYA** ISWVRQAPGGGLEWMGGI**M**STFGS**A**NYAQR**F**QGRVIT**E**DES 60  
13124-9956\_15283\_7 ASVKVSCKASGGTFR**TYA** ISW**G**RQAPGGGLEWMGGI**M**STFGS**A**NYAQR**F**QGRVIT**E**DES 60  
13124\_6539\_7943\_7 ASVKVSCKASGGT**LPT**YA **VN**WVRQAPGGGLEWMGGI**F**STFGS**A**NYAQ**K**FQGR**L**IT**E**D**S** 60  
13124-5113\_23035\_7 ASVKVSCKASGGT**LPT**YA **VN**WVRQAPGGGLEWMGGI**F**STFGS**A**NYAQ**K**FQGR**L**IT**E**D**S** 60  
13124-2646\_10466\_7 ASVKVSCKASGGT**LPT**YA **VN**WVRQAPGGGLEWMGGI**F**STFGS**A**NYAQ**K**FQGR**L**IT**E**D**S** 60  
13124-2009\_10951\_7 ASVKVSCKASGGT**LPT**YA **VN**WVRQAPGGGLEWMGGI**F**STFGS**A**NYAQ**K**FQGR**L**IT**E**D**S** 60  
13124-9577\_12166\_7 ASVKVSCKASGGTFR**TYA** INWVRQAPGGGLEW**K**GGI**M**STFG**A**T**T**YA**Q**S**F**QGRVIT**A**D**S** 60  
13124\_9099\_7882\_7 ASVKVSCKASGGT**LPT**YA **VN**WVRQAPGGGLEWMGGI**F**STFGS**A**NYAQ**K**FQGR**L**IT**E**D**S** 60  
13124-13289\_8683\_7 ASVKVSCKASGGTFR**TYA** ISWVRQAPGGGLEWMGGI**M**STFGS**A**NYAQR**F**QGRVIT**E**DES 60  
13124-3751\_15933\_7 ASVKVSCKASGGT**LPT**YA **VN**WVRQAPGGGLEWMGGI**F**STFGS**A**NYAQ**K**FQGR**L**IT**E**D**S** 60  
13124-0093\_19171\_7 ASVKVSCKASGGTFR**TYA** ISWVRQAPGGGLEWMGGI**M**STFGS**A**NYAQR**F**QGRVIT**E**DES 60  
13124-1133\_12137\_7 ASVKVSCKASGGTFR**TYA** ISWVRQAPGGGLEWMGGI**M**STFGS**A**NYAQR**F**QGRVIT**E**DES 60  
13124-6262\_20261\_7 ASVKVSCKASGGTFR**TYA** ISWVRQAPGGGLEWMGGI**M**STFGS**A**NYAQR**F**QGRVIT**E**DES 60  
13124-2302\_16661\_7 - SVKVSCKASGGTFR**TYA** ISWVRQAPGGGLEWMGGI**M**STFGS**A**NYAQR**F**QGRVIT**E**DES 59  
13124\_5920\_9696\_7 ASVKVSCKASGGTFR**TYA** ISWVRQAPGGGLEWMGGI**M**STFGS**A**NYAQR**F**QGRVIT**E**DES 60  
13124\_3239\_9156\_7 ASVKVSCKASGGTFR**TYA** ISWVRQAPGGGLEWMGGI**M**ST**L**G**S**ANYAQR**F**QGRVIT**E**DES 60  
13124-6793\_11592\_7 ASVKVSCKASGGTFR**TYA** ISW**A**RQAPGGGLEWMGGI**M**STFGS**A**NYAQR**F**QGRVIT**E**DES 60  
13124-7842\_13580\_7 ASVKVSCKASGGTFR**TYA** ISWVRQAPGGGLEWMGGI**M**STFGS**A**NYAQR**F**QGRVIT**E**DES 60  
13124\_4115\_7313\_7 ASVKVSCKASGGTFR**TYA** ISWVRQAPGGGLEWMGGI**M**STFGS**A**NYAQR**F**QGRVIT**E**DES 60  
13124-2764\_15933\_7 ASVKVSCKASGGTFR**TYA** ISWVRQAPGGGLEWMGGI**M**STFGS**A**NYAQR**F**QGRVIT**E**DES 60  
13124-4814\_16906\_7 **G**SVKVSCKASGGTFR**TYA** ISWVRQAPGGGLEWMGGI**M**STFGS**A**NYAQR**F**QGRVIT**E**DES 60  
13124-12894\_8455\_7 ASVKVSCKASG**D**T**F****S**N**YA** INWVRQAPGGGLEWMGGI**F**STFG**A**NYAQ**K**FQGRVIT**A**D**D**S 60  
13124-4021\_10214\_7 ASVKVSCKASG**D**TFR**TYA** INWVRQAPGGGLEWMGGI**M**STFG**K**T**S**YAQR**F**QGRVIT**A**D**S** 60  
13124-14652\_6376\_7 ASVKVSCKASGGTFR**TYA** ISWVRQAPGGGLEWMGGI**M**STFGS**A**NYAQR**F**QGRVIT**E**DES 60  
13124-1934\_15415\_7 ASVKVSCKASGGT**LT**TYA INWVRQAPGGGLEWMGGI**F**STFG**A**NYAQ**K**FQGRVIT**A**D**D**S 60  
13124-4075\_21379\_7 ASVKVSCKASGGTFR**TYA** ISWVRQAPGG**P**EWMMGGI**M**STFGS**A**NYAQR**F**QGRVIT**E**DES 60  
13124-1819\_23558\_7 ASVKVSCKASGGTFR**TYA** ISWVRQAPGGGLEWMGGI**M**STFGS**A**NYAQR**F**QGRVIT**E**DES 60  
13124-1674\_19239\_7 - - VKVSCKASGGTFR**TYA** ISWVRQAPGGGLEWMGGI**M**STFGS**A**NYAQR**F**QGRVIT**E**DES 58

13124-5141\_14947\_7 ASVKVSCKASGGTFRITYA ISWVRQAPGQGLEWMGGIMSTFGSANYAQRFFQGRVTITEDES 60  
13124-8320\_22493\_7 ASVKVSCKASGGTFRITYA ISWVRQAPGQGLEWMGGIMSTFGSANYAQRFFQGRVTITEDES 60  
13124-9273\_20388\_7 ASVKVSCKASGGTFRITYA ISWVRQAPGQGLEWMGGIMSTFGSANYAQRFFQGRVTITEDES 60  
13124-11434\_5872\_7 - - -VSKASGGTFRITYA ISWVRQAPGQGLEWMGGIMSTFGSANYAQRFFQGRVTITEDES 56  
13124-6982\_17104\_7 ASVKVSCKASGGTLPITYA VNWVRQAPGQGLEWMGGIMSTFGSANYAQRFFQGRVTITEDES 60  
13124-11455\_8079\_7 ASVKVSCKASGGTLPITYA VNWVRQAPGQGLEWMGGIMSTFGSANYAQRFFQGRVTITEDES 60  
13124-2646\_15030\_7 ASVKVSCKASGGTFRITYA ISWVRQAPGQGLEWMGGIMSTFGSANYAQRFFQGRVTITEDES 60  
13124-8583\_19748\_7 ASVKVSCKASGGTFRITYA ISWVRQAPGQGLEWMGGIMSTFGSANYAQRFFQGRVTITEDES 60  
13124-5500\_4716\_7 ASVKVSCKASGGTFRITYA ISWVRQAPGQGLEWMGGIMSTFGSANYAQRFFQGRVTITEDES 60  
13124-10551\_5365\_7 ASVKVSCKASGGTLPITYA VNWVRQAPGQGLEWMGGIMSTFGSANYAQRFFQGRVTITEDES 60  
13124-5687\_11081\_7 ASVKVSCKASGGTRTTYGINWVRQAPGQGLEWMGGIMSTFGSANYAQRFFQGRVTITEDES 60  
13124-9986\_6754\_7 ASVKVSCKASGGTLPITYA VNWVRQAPGQGLEWMGGIMSTFGSANYAQRFFQGRVTITEDES 60  
13124-5131\_14932\_7 ASVKVSCKASGGTFRITYA ISWVRQAPGQGLEWMGGIMSTFGSANYAQRFFQGRVTITEDES 60  
13124-4630\_13426\_7 ASVKVSCKASGGTFRITYA ISWVRQAPGQGLEWMGGIMSTFGSANYAQRFFQGRVTITEDES 60  
13124-0784\_12259\_7 ASVKVSCKASGGTLTTYAINWVRQAPGQGLEWMGGIMSTFGSANYAQRFFQGRVTITEDES 60  
13124-13894\_9673\_7 ASVKVSCKASGGTLPITYA VNWVRQAPGQGLEWMGGIMSTFGSANYAQRFFQGRVTITEDES 60  
13124-3199\_9372\_7 ASVKVSCKASGGTFRITYA ISWVRQAPGQGLEWMGGIMSTFGSANYAQRFFQGRVTITEDES 60  
13124-5824\_17565\_7 ASVKVSCKASGGTSFSGYPISWVRQAPGQGLEWMGGIMSTFGSANYAQRFFQGRVTITEDES 60  
13124-11447\_8278\_7 ASVKVSCKASGGTFRITYA ISWVRQAPGQGLEWMGGIMSTFGSANYAQRFFQGRVTITEDES 60  
13124-8718\_8350\_7 ASVKVSCKASGGTFRITYA ISWVRQAPGQGLEWMGGIMSTFGSANYAQRFFQGRVTITEDES 60  
13124-1669\_14663\_7 ASVKVSCKASGGTFRITYA ISWVRQAPGQGLEWMGGIMSTFGSANYAQRFFQGRVTITEDES 60  
13124-11149\_8008\_7 ASVKVSCKASGGTFRITYA ISWVRQAPGQGLEWMGGIMSTFGSANYAQRFFQGRVTITEDES 60  
13124-2846\_11434\_7 ASVKVSCKASAGTFSNYAIYWVRQAPGQGLEWMGGIMSTFGSANYAQRFFQGRVTITEDES 60  
13124-2687\_15585\_7 ASVKVSCKASGGTFSNYAIYWVRQAPGQGLEWMGGIMSTFGSANYAQRFFQGRVTITEDES 60  
13124-5358\_9258\_7 ASVKVSCKASGGTFRITYA ISWVRQAPGQGLEWMGGIMSTFGSANYAQRFFQGRVTITEDES 60  
13124-2107\_10523\_7 ASVKVSCKASGGTFRITYA ISWVRQAPGQGLEWMGGIMSTFGSANYAQRFFQGRVTITEDES 60  
13124-2427\_12231\_7 ASVKVSCKASGGTLTTYAINWVRQAPGQGLEWMGGIMSTFGSANYAQRFFQGRVTITEDES 60  
13124-9497\_21934\_7 ASVKVSCKASGGDTFRITYAINWVRQAPGQGLEWMGGIMSTFGSANYAQRFFQGRVTITEDES 60  
13124-5247\_11941\_7 ASVKVSCKASGGTFRITYA ISWVRQAPGQGLEWMGGIMSTFGSANYAQRFFQGRVTITEDES 60  
13124-7283\_4084\_7 ASVKVSCKASGGTFRITYA ISWVRQAPGQGLEWMGGIMSTFGSANYAQRFFQGRVTITEDES 60  
13124-6630\_11242\_7 ASVKVSCKSSGGSFSDYVITWVRQAPGQGLEWMGGIMSTFGSANYAQRFFQGRVTITEDES 60  
13124-0220\_19398\_7 ASVKVSCKASGGTFRITYA ISWVRQAPGQGLEWMGGIMSTFGSANYAQRFFQGRVTITEDES 60  
13124-6751\_12818\_7 ASVKVSCKASGGTFRITYA ISWVRQAPGQGLEWMGGIMSTFGSANYAQRFFQGRVTITEDES 60  
13124-2649\_11192\_7 ASVKVSCKASGGTFRITYA ISWVRQAPGQGLEWMGGIMSTFGSANYAQRFFQGRVTITEDES 60  
13124-9530\_21220\_7 ASVKVSCKASGGTLPITYA VNWVRQAPGQGLEWMGGIMSTFGSANYAQRFFQGRVTITEDES 60  
13124-0172\_13235\_7 ASVKVSCKASGGTLTTYAINWVRQAPGQGLEWMGGIMSTFGSANYAQRFFQGRVTITEDES 60  
13124-2789\_9174\_7 ASVKVSCKASGGTLTTYAINWVRQAPGQGLEWMGGIMSTFGSANYAQRFFQGRVTITEDES 60  
13124-3398\_11605\_7 ASVKVSCKASGGTLTTYAINWVRQAPGQGLEWMGGIMSTFGSANYAQRFFQGRVTITEDES 60  
13124-2079\_14429\_7 ASVKVSCKASGGTLTTYAINWVRQAPGQGLEWMGGIMSTFGSANYAQRFFQGRVTITEDES 60  
13124-3016\_11235\_7 ASVKVSCKASGGTFRITYA ISWVRQAPGQGLEWMGGIMSTFGSANYAQRFFQGRVTITEDES 60  
13124-7945\_8135\_7 ASVKVSCKASGGTFRITYA ISWVRQAPGQGLEWMGGIMSTFGSANYAQRFFQGRVTITEDES 60  
13124-5742\_4672\_7 ASVKVSCKASGGTFRITYA ISWVRQAPGQGLEWMGGIMSTFGSANYAQRFFQGRVTITEDES 60  
13124-4242\_12552\_7 ASVKVSCKASGGTFRITYA ISWVRQAPGQGLEWMGGIMSTFGSANYAQRFFQGRVTITEDES 60  
13124-4022\_12442\_7 ASVKVSCKASGGTFRITYA ISWVRQAPGQGLEWMGGIMSTFGSANYAQRFFQGRVTITEDES 60  
13124-3434\_17111\_7 ASVKVSCKASGGTFRITYA ISWVRQAPGQGLEWMGGIMSTFGSANYAQRFFQGRVTITEDES 60  
13124-5155\_16928\_7 ASVKVSCKASGGDTFRITYAINWVRQAPGQGLEWMGGIMSTFGSANYAQRFFQGRVTITEDES 60  
13124-9502\_14439\_7 ASVKVSCKASGGYSFTSYAMHWVRQAPGQGLEWMGGIMSTFGSANYAQRFFQGRVTITEDES 60  
13124-4887\_19093\_7 ASVKVSCKASGGTLPITYA VNWVRQAPGQGLEWMGGIMSTFGSANYAQRFFQGRVTITEDES 60  
13124-7862\_18760\_7 ASVKVSCKASGGTFRITYA ISWVRQAPGQGLEWMGGIMSTFGSANYAQRFFQGRVTITEDES 60  
13124-9420\_11732\_7 ASVKVSCKASGGTFRITYA ISWVRQAPGQGLEWMGGIMSTFGSANYAQRFFQGRVTITEDES 60  
13124-5327\_11154\_7 ASVKVSCKASGGTFRITYA ISWVRQAPGQGLEWMGGIMSTFGSANYAQRFFQGRVTITEDES 60  
13124-7222\_19833\_7 ASVKVSCKASGGTFRITYA ISWVRQAPGQGLEWMGGIMSTFGSANYAQRFFQGRVTITEDES 60  
13124-6620\_22193\_7 ASVKVSCKASGGTFRITYA ISWVRQAPGQGLEWMGGIMSTFGSANYAQRFFQGRVTITEDES 60  
13124-7778\_16183\_7 ASVKVSCKASGGTFRITYA ISWVRQAPGQGLEWMGGIMSTFGSANYAQRFFQGRVTITEDES 60  
13124-8010\_16995\_7 ASVKVSCKASGGTLPITYA VNWVRQAPGQGLEWMGGIMSTFGSANYAQRFFQGRVTITEDES 60  
13124-10630\_5219\_7 ASVKVSCKASGGTLPITYA VNWVRQAPGQGLEWMGGIMSTFGSANYAQRFFQGRVTITEDES 60  
13124-4923\_16041\_7 ASVKVSCKASGGTFRITYA ISWVRQAPGQGLEWMGGIMSTFGSANYAQRFFQGRVTITEDES 60  
13124-9997\_20587\_7 ASVKVSCKASGGTFRITYA ISWVRQAPGQGLEWMGGIMSTFGSANYAQRFFQGRVTITEDES 60  
13124-7237\_18302\_7 ASVKVSCKASGGTFRITYA ISWVRQAPGQGLEWMGGIMSTFGSANYAQRFFQGRVTITEDES 60  
13124-3515\_14854\_7 ASVKVSCKASGGTLPITYA VNWVRQAPGQGLEWMGGIMSTFGSANYAQRFFQGRVTITEDES 60  
13136-9104\_15300\_6 ASVKVSCKASGGTFRITYA ISWVRQAPGQGLEWMGGIMSTFGSANYAQRFFQGRVTITEDES 60

H104 TDTAYMELSSLRSEDATALYYCARDYYRGEFSGYDFESWGQGLVTVSS 107  
13124-13108\_5443\_7 TNTAYMELSSLRSEDATAVYYCARDYYRGEFSGYDFESWGQGLVTVSS 108  
13124-17064\_7911\_7 TNTAYMELSSLRSEDATAVYYCARDHYSGEFSGYDFESWGQGLVTVSS 108  
13124-17408\_2631\_7 TNTAYMELSSLRSEDATAVYYCARDYYRGEFSGYDFESWGQGLVTVSS 108  
13124-8638\_3852\_7 TNTAYMELSSLRSEDATAVYYCARDYYRGEFSGYDFESWGQGLVTVSS 108  
13124-13096\_5429\_7 TNTAYMELSSLRSEDATAVYYCARDYYRGEFSGYDFESWGQGLVTVSS 108  
13124-11655\_2473\_7 TNTAYMELSSLRSEDATAVYYCARDYYRGEFSGYDFESWGQGLVTVSS 108  
13124-6426\_6714\_7 TSTAFMVLSLRSSEDTAVYYCARDYYRGEFSGYDFESWGPGTLVTVS - 107  
13124-3939\_25072\_7 TNTAYMELSSLRSEDATAVYYCARDYYRGEFSGYDFESWGQGLVTVSS 108  
13124-4626\_10993\_7 TSTAYMELSSLRSEDATAVYYCARDYYRGEFSGYDFESWGQGLVTVSS 108  
13124-11567\_8443\_7 TNTAYMELSSLRSEDATAVYYCARDYYRGEFSGYDFESWGQGLVTVSS 108  
13124-8121\_12403\_7 TSTAYMELSSLRSEDATAVYYCARDYYRGEFSGYDFESWGQGLVTVSS 108  
13124-7044\_12701\_7 TNTAYMELSSLRSEDATAVYYCARDYYRGEFSGYDFESWGQGLVTVSS 108  
13124-8117\_15788\_7 TNTAYMELSSLRSEDATAVYYCARDYYRGEFSGYDFESWGQGLVTVSS 108

13124-7893\_13223\_7 TNTAYMELSSLRSEDTAVYYCARDYYRGEFSGYDFESWGQGT L VTVSS 108  
13124-3158\_15786\_7 TNTAYMELSSLRSEDTAVYYCARDYYRGEFSGYDFESWGQGT L VTVSS 108  
13124-8815\_14788\_7 TNTAYMELSSLRSEDTAVYYCARDYYRGEFSGYDFESWGQGT L VTVSS 108  
13124-2327\_12778\_7 TNTAYMELSSLRSEDTAVYYCARDHYRGEFSGYDFESWGQGT L VTVSS 108  
13124-8105\_15803\_7 TNTAYMELSSLRSEDTAVYYCARDYYRGEFSGYDFESWGQGT L VTVSS 108  
13124-7443\_18179\_7 TNTAYMELSSLRSEDTAVYYCARDYYRGEFSGYDFESWGQGT L VTVSS 108  
13124-9311\_18403\_7 TNTAYMELSSLRSEDTAVYYCARDYYGGEFSGYDFESWGQGT L VTVSS 108  
13124-6719\_23710\_7 TSTAFMVLSSLRSEDTAVYYCARDYYRGEFSGYEFDSWGPGL VTVSS 108  
13124-5057\_16929\_7 TNTAYMELSSLRSEDTAVYYCARDYYRGEFSGYDFESWGQGT L VTVSS 108  
13124-0447\_20106\_7 TNTAYMELSSLRSEDTAVYYCARDYYRGEFSGYDFESWGQGT L VTVSS 108  
13124-9291\_18407\_7 TNTAYMELSSLRSEDTAVYYCARDYYGGEFSGYDFESWGQGT L VTVSS 108  
13124-6421\_16382\_7 TNTAYMELSSLRSEDTAVYYCARDYYRGEFSGYDFESWGQGT L VTVSS 108  
13124-0445\_20088\_7 TNTAYMELSSLRSEDTAVYYCARDYYRGEFSGYDFESWGQGT L VTVSS 108  
13124-9924\_23840\_7 TSTAFMVLSSLRSEDTAVYYCARDYYRGEFSGYEFDSWGPGL VTVSS 108  
13124-9837\_20019\_7 TNTAYMELSSLRSEDTAVYYCARDYYRGEFSGYDFESWGQGT L VTVSS 107  
13124-6959\_21421\_7 TNTAYMELSSLRSEDTAVYYCARDYYRGEFSGYDFESWGQGT L VTVSS 108  
13124-8236\_14734\_7 TNTAYMELSSLRSEDTAVYYRARDYYRGEFSGYDFESWGQGT L VTVSS 108  
13124-5203\_15739\_7 TNTAYMELSSLRSEDTAVYYCARDYYRGEFSGYDFESWGQGT L VTVSS 108  
13124-7225\_16134\_7 TNTAYMELSSLRSEDTAVYYCARDYYRGESSGYDFESWGQGT L VTVSS 108  
13124-9918\_17841\_7 TNTAYMELSSLRSEDTAVYYCARDYYRGEFSGYDFESWGQGT L VTVSS 108  
13124-9933\_23859\_7 TSTAFMVLSSLRSEDTAVYYCARDYYRGEFSGYEFDSWGPGL VTVSS 108  
13124-8423\_17888\_7 TNTAYMEVSSLRSEDTAVYYCARDYYRGEFSGYDFESWGQGT L VTVSS 108  
13124-9137\_20546\_7 TNTAYMELSSLRSEDTAVYYCARDHYRGEFSGYDFESWGQGT L VTVSS 108  
13124-1218\_13822\_7 TNTAYMELSSLRSEDTAVYYCARDHYGGEFSGYDFESWGQGT L VTVSS 108  
13124-10130\_6428\_7 TNTAYMELSSLRSEDTAVYYCARDYYRGEFSGYDFESWGQGT L VTVSS 108  
13124\_9768\_5122\_7 TNTAYMELSSLRSEDTAVYYCARDYYRGEFSGYDFESWGQGT L VTVSS 108  
13124-3967\_14662\_7 TNTAYMELSSLRSEDTAVYYCARDYYRGEFSGYDFESWGQGT L VTVSS 107  
13124-8620\_19010\_7 TNTAYMELSSLRSEDTAVYYCARDYYRGEFSGYDFESWGQGT L VTVSS 108  
13124\_9198\_5704\_7 TSTAYMELSSLRSEDTAVYFCARSHYRGEFSGYDFESWGQGT L VTVSS 108  
13124-9035\_16848\_7 TNTAYMELSSLRSEDTAVYYCARDYYRGEFSGYDFESWGQGT L VTVSS 108  
13124-7851\_16910\_7 TITAYMELSSLRSEDTAVYYCARDYYRGEFSGYDFESWGQGT L VTVSS 108  
13124-1678\_14520\_7 TSTAYMELSSLRSEDTAVYYCARDYYRGEFSGYDFESWGQGT L VTVSS 108  
13124-7932\_14529\_7 TSTAFMVLSSLRSEDTAVYYCARDYYRGEFSGYEFDSWGPGL VTVSS 108  
13124-5731\_18956\_7 TNTAYMELSSLRSEDTAVYYCARDYYRGEFSGYDFESWGQGT L VTVSS 108  
13124-6528\_22981\_7 TNTAYMELSSLRSEDTAVYYCAGDYRGEFSGYDFESWGQGT L VTVSS - 107  
13124-0763\_10527\_7 TNTAYMELSSLRSEDTAVYYCARDYYRGEFSGYDFESWGQGT L VTVSS 108  
13124-11498\_8306\_7 TNTAYMELSSLRSEDTAVYYCARDYYRGEFSGYDFESWGQGT L VTVSS 108  
13124-7548\_19327\_7 TNTAYMELSSLRSEDTAVYYCARDHYRGEFSGYDFESWGQGT L VTV PQ 108  
13124\_4874\_5395\_7 TDAYMELSSLRSEDTAVYYCARDYYRGEFSGYDFESWGQGT L VTVSS 108  
13124\_3863\_8170\_7 TNTAYMELSSLRSEDTAVYYCARDYYRGEFSGYDFESWGQGT L VTVSS 108  
13124\_8455\_3398\_7 TSTAFMVLSSLRPEDTAVYYCARDYYRGEFSGYEFDSWGPGL VTVSS 107  
13124-14332\_7138\_7 TITAYMELSSLRSEDTAVYYCARDYYRGEFSDYAFESRGGQGT L VTVSS 108  
13124\_5940\_8378\_7 TNTAYMELSSLRSEDTAVYYCAGDHYRGEFSGYDFESWGQGT L VTVSS 108  
13124-3596\_10667\_7 TNTDYLEVSSLRSEDTAVYYCTRDRYRGEFSGYDFESWGQGT L VTVSS 108  
13124-9089\_22037\_7 TSTAFMVLSSLRSEDTAVYYCARDYYRGEFSGYEFDSWGPGL VTVSS 108  
13124\_9831\_5195\_7 TNTAYLELSSLRSEDTAVYYCAGDHYRGEFSGYDFESWGQGT L VTVSS 108  
13124\_8481\_5588\_7 TNTAYMELSSLRSEDTAVYYCARDYYRGEFSGYDFESWGQGT L VTVSS 108  
13124-13321\_7194\_7 TNTAYMELSSLRSEDTAVYYCARDYYRGEFSGYDFESWGQGT L VTVSS 108  
13124\_8284\_4310\_7 TITAYMELSSLRSEDTAVYYCARDYYRGEFSDYAFESWGQGT L VTVSS 108  
13124\_2879\_7680\_7 TNTAYMELSSLRSEDTAVYYCARDYYRGEFSGYDFESWGQGT L VTVSS 108  
13124\_5918\_7566\_7 TNTAYMELSSLRSEDTAVYYCARDYYRGEFSGYDFESWGQGT L VTVSS 108  
13124-11929\_6964\_7 TNTAYMELSSLRSEDTAVYYCARDYYRGEFSGYDFESWGQGT L VTVSS 108  
13124-6794\_21865\_7 TNTAYMELSSLRSEDTAVYYCARDYYRGEFSGYDFESWGQGT L VTVSS 108  
13124\_7250\_8668\_7 TNTAYMELSSLRSEDTAVYYCARDYYRGEFSGYDFESWGQGT L VTVSS 108  
13124-5023\_22438\_7 TNTAYMELSSLRSEDTAVYYCARDYYRGEFSGYDFESWGQGT L VTVSS 108  
13124-3815\_10934\_7 TNTAYMELSSLRSEDTAVYYCARDYYRGEFSGYDFESWGQGT L VTVSS 108  
13124-7991\_18770\_7 TNTAYMELSSLRSEDTAVYYCARDYYRGEFSGYDFESWGQGT L VTVSS 108  
13124-3867\_22831\_7 TSTAYMELSSLRSEDTAVYYCARDYYRGEFSDYDFESWGQGT L VTVSS 108  
13124-9677\_18815\_7 TNTAYMELSSLRSEDTAVYYCARDNYRGEFSGYDFESWGQGT L VTVSS 108  
13124-11897\_8962\_7 TITAYMELSSLRSEDTAVYYCARDYYRGEFSDYAFESRGGQGT L VTVSS 108  
13124-4170\_11198\_7 TNTAYMELSSLRSEDTAVYYCARDYYRGEFSGYDFESWGQGT L VTVSS 108  
13124-7859\_11814\_7 TNTAYLELSSLRSEDTAVYYCAGDHYRGEFSGYDFESWGQGT L VTVSS 108  
13124-2848\_20542\_7 TSTAFMVLSSLRSEDTAVYYCARDYYRGEFSGYEFDSWGPGL VTVSS 108  
13124-0540\_24508\_7 TSTAFMVLSSLRSEDTAVYYCARDYYRGEFSGYEFDSWGPGL VTVSS 108  
13124-4107\_12327\_7 TNTAYMELSSLRSEDTAVYYCARDYYRGEFSGYDFESWGQGT L VTVSS 108  
13124-9359\_11629\_7 TNTAYMELSSLRSEDTAVYYCARDYYRGEFSGYDFESWGQGT L VTVSS 108  
13124-4870\_23583\_7 TNTAYMELSSLRSEDTAVYYCARDYYRGEFSGYDFESWGQGT L VTVSS 108  
13124-4078\_18346\_7 TNTAYMELSSLRSEDTAVYYCARDYYRGEFSGYDFESWGQGT L VTVSS 108  
13124\_9614\_9960\_7 TSTAYMELSSLRSEDTAVYYCARDYYRGEFSGYDFESWGQGT L VTVSS 108  
13124-2552\_10161\_7 TNTAYMELSSLRSEDTAVYYCARDYYRGEFSGYDFESWGQGT L VTVSS 108  
13124-11041\_6747\_7 TNTAYMELSSLRSEDTAVYYCARDYYRGEFSGYDFESWGQGT L VTVSS 108  
13124-8185\_18147\_7 TNTAYMELSSLRSEDTAVYYCARDYYRGEFSGYDFESWGQGT L VTVSS 108  
13124-8027\_13180\_7 TGTAYMELSSNLRSEDTAVYYCARDNYRGEFSGYDFESRGGQGT L VTVSS 108  
13124\_4111\_9790\_7 TNTAYMELSSLRSEDTAVYYCARDYYRGEFSGYDFESWGQGT L VTVSS 108  
13124\_4128\_9784\_7 TNTAYMELSSLRSEDTAVYYCARDYYRGEFSGYDFESWGQGT L VTVSS 108  
13124-2862\_22915\_7 TNTAYMELSSLRSEDTAVYYCARDYYRGEFSGYDFESWGQGT L VTVSS 108

|                    |                                                      |     |
|--------------------|------------------------------------------------------|-----|
| 13124-14791_9711_7 | TNTAYMELSSLRSEDTAVYYCARDYYRGEFSGYDFESWGQGT L VTVSS   | 108 |
| 13124-5213_15196_7 | TNTAYMELSSLRSDVDTAVYYCARDYYRGEFSGYDFESWGQGT L VTVSS  | 108 |
| 13124-2079_15900_7 | TNTAYMELSSLRSEDTAVYYCARDYYRGEFSGYDFESWGQGT L VTVSS   | 108 |
| 13124-13540_4548_7 | TSTAFMVLSSLRSEDTAVYYCARDYYRGEFSGYEFDSWGPGLTVTVSS     | 108 |
| 13124-2382_16449_7 | TNTAYMELSSLRSEDTAVYYCARDYYRGEFSGYDFESWGQGT L VTVSS   | 108 |
| 13124-4993_22878_7 | TNTAYMELSSLRSEDTAVYYCARDYYRGEFSGYDFESWGQGT L VTVSS   | 107 |
| 13124-4437_23388_7 | TNTAYMELSSLRSEDTAVYYCARDYYRGEFSGYDFESWGQGT L VTVSS   | 108 |
| 13124-8008_13185_7 | TGTAYMELSSNLRSEDTAVYYCARDNYRGEFSGYDFESRQGGT L VTVSS  | 108 |
| 13124-7376_16321_7 | TNTAYMELSSLRSEDTAVYYCARDYYRGEFSGYDFESWGQGT L VTVSS   | 108 |
| 13124-3709_19439_7 | TITAYMELSSLRSEDTAVYYCARDYYRGEFSGDYAFESLGGGT L VTVSS  | 108 |
| 13124-4765_15700_7 | TNTAYMELSSLRSEDTAVYYCARDYYRGEFSGYDFESWGQGT L VTVSS   | 108 |
| 13124-9639_24880_7 | TNTAYMELSSLRSEDTAVYYCARDYYRGEFSGYDFESWGQGT L VTVSS   | 108 |
| 13124-8292_21235_7 | TNTAYMELSSLRSEDTAVYYCARDYYRGEFSGYDFESWGQGT L VTVSS   | 108 |
| 13124-9713_21352_7 | TNTAYMELSSLRSEDTAVYYCARDYYRGEFSGYDFESWGQGT L VTVSS   | 108 |
| 13124-9427_20019_7 | TNTAYMELSSLRSEDTAVYYCARDYYRGEFSGYDFESWGQGT L VTVSS   | 108 |
| 13124-5040_16938_7 | TNTAYMELSSLRSEDTAVYYCARDYYRGEFSGYDFESWGQGT L VTVSS   | 108 |
| 13124-8347_21942_7 | TSTAFMVLSSLRSEDTAVYYCARDYYRGEFSGYEFDSWGPGLTV - -     | 105 |
| 13124-5777_22947_7 | TSTAFVVLSSLRSEDTAVYYCARDYYRGEFSGYEFDSWGPGLTVTVSS     | 108 |
| 13124_4397_9065_7  | TSTAFMVLSSLRSEDTAVYYCARDYYRGEFSGYEFDSWGPGLTVTVSS     | 108 |
| 13124-3931_10267_7 | TNTAYMELSSLRSEDTAVYYCARDYYRGEFSGYDFESWGQGT L VTVSS   | 108 |
| 13124-5777_18414_7 | TSTAFMVLSSLRSEDTAVYYCARDYYRGEFSGYEFDSWGPGLTVTVSS     | 108 |
| 13124-2961_10599_7 | TNTAYMELSSLRSEDTAVYYCARDYYRGEFSGYDFESWGQGT L VTVSS   | 108 |
| 13124-4833_13428_7 | TSTAYMELSSLRSEDTAVYYCARDYYRGEFSGYDFESWGQGT L VTVSS   | 108 |
| 13124-7290_10049_7 | TSTAYMELSSLRSEDTAVYYCARDYYRGEFSGYDFESWGQGT L VTVSS   | 108 |
| 13124-10984_7775_7 | TNTAYMELSSLRSEDTAVYYCARDYYRGEFSGYDFESWGQGT L VTVSS   | 108 |
| 13124-5676_10490_7 | TSTAYMELSSLRSEDTAVYYCARDYYRGEFSGYDFESWGQGT L VTVSS   | 108 |
| 13124-4431_19862_7 | TNTAYMELSSLRSEDTAVYYCARDYYRGEFSGYDFESWGQGT L VTVSS   | 108 |
| 13124-8438_21841_7 | TSTAFMVLSSLRSEDTAVYYCARDYYRGEFSGYEFDSWGPGLTVTVSS     | 108 |
| 13124_4798_9013_7  | TNTAYMELSSLRSEDTAVYYCARDYYRGEFSGYDFESWGQGT L VTVSS   | 107 |
| 13124-13204_9680_7 | TNTAYMELSSLRSEDTAVYYCARDYYRGEFSGYDFESWGQGT L VTVSS   | 107 |
| 13124-12757_5026_7 | TSTAFMVLSSLRSEDTAVYYCARDYYRGEFSGYEFDSWGPGLTVTVSS     | 108 |
| 13124-13220_9689_7 | TNTAYMELSSLRSEDTAVYYCARDYYRGEFSGYDFESWGQGT L VTVSS   | 107 |
| 13124-7770_14522_7 | TNTAYMELSSLRSEDTAVYYCARDYYRGEFSGYDFESWGQGT L VTVSS   | 108 |
| 13124-7560_16450_7 | TNTAYMELSSLRSEDTAVYYCARDYYRGEFSGYDFESWGQGT L VTVSS   | 108 |
| 13124-4447_14799_7 | TITAYMELSSLRSEDTAVYYCARDYYRGEFSGDYDFESWGQGT L VTVSS  | 108 |
| 13124_7855_8304_7  | TNTAYMEVSSLRSEDTAVYYCARDYYGGEFSGYDFESWGQGT L VTVSS   | 108 |
| 13124-8448_21825_7 | TSTAFMVLSSLRSEDTAVYYCARDYYRGEFSGYEFDSWGPGLTVTVSS     | 108 |
| 13124-9376_12733_7 | TNTAYMELSSLRSEDTAVYYCARDYYRGEFSGYDFESWGQD L VTVSS    | 108 |
| 13124-0561_12859_7 | TSTAFMVLSSLRSEDTAVYYCARDYYRGEFSGYEFDSWGPGLTVTVSS     | 108 |
| 13124-18447_9188_7 | TNTAYMELSSLRSEDTAVYYCARDYYRGEFSGYDFESWGQGT L VTVSS   | 108 |
| 13124-3651_15165_7 | TITAYMELSSLRSAADTAVYYCARDYYRGEFSGDYAFESWGQGT L VTVSS | 108 |
| 13124-8913_15798_7 | TSTAFMVLSSLRSEDTAVYYCARDYYRGEFSGYEFDSWGPGLTVTVSS     | 108 |
| 13124-4025_16095_7 | TSTAYLELSSLSHEDTAMYYCAGDPYRGEFSGYDFESWGQGT L VTVSS   | 108 |
| 13124-5309_16512_7 | TSTAFMVLSSLRSEDTAVYYCARDYYRGEFSGYEFDSWGPGLTVTVSS     | 108 |
| 13124-3780_18957_7 | TSTAFMVLSSLRSEDTAVYYCARDYYRGEFSGYEFDSWGPGLTVTVSS     | 108 |
| 13124-1006_19809_7 | TNTAYMELSSLRSEDTAVYYCARGYYRGEFSGYDFESWGQGT L VTVSS   | 108 |
| 13124-6574_14673_7 | TNTAYMELSSLRSEDTAVYYCARDYYRGEFSGYDFESWGQGT L VTVSS   | 108 |
| 13124-0469_13993_7 | TSTAYMELSSLRSEDTAVYYCARDYYRGEFSGYDFESWGQGT L VTVSS   | 108 |
| 13124-2633_17804_7 | TSTAFMVLSSLRSEDTAVYYCARDYYRGEFSGYEFDSWGPGLTVTVSS     | 108 |
| 13124-5230_13315_7 | TNTAYMELSSLRSEDTAVYYCARDYYRGEFSGYDFESWGQGT L VTVSS   | 107 |
| 13124-6595_14658_7 | TNTAYMELSSLRSEDTAVYYCARDYYRGEFSGYDFESWGQGT L VTVSS   | 108 |
| 13124-3611_18936_7 | TNTAYMELSSLRSEDTAVYYCARDYYRGEFSGYDFESWGQGT L VTVSS   | 108 |
| 13124-8388_23214_7 | TNTAYMELSSLRSEDTAVYYCARDYYRGEFSGYDFESWGQGT L VTVSS   | 108 |
| 13124-1740_10157_7 | TNTAYMELSSLRSEDTAVYYCARDYYRGEFSGYDFESWGQGT L VTVSS   | 108 |
| 13124-9729_17599_7 | TSTAFMVLSSLRSEDTAVYYCARDYYRGEFSGYEFDSWGPGLTVTVSS     | 108 |
| 13124-5134_17304_7 | TITAYMELSSLRSEDTAVYYCARDYYRGEFSGYDFESWSQGT L VTVSS   | 108 |
| 13124-0984_22407_7 | TSTPFMVLSSLRSEDTAVYYCARDYYRGEFSGYEFDSWGPGLTVTVSS     | 108 |
| 13124-4171_16525_7 | TNTAYMELSSLRSEDTAVYYCARDYYRGEFSGYDFESWGQGT L VTVSS   | 108 |
| 13124-6490_17643_7 | TNTAYMEVRS LRSEDTAVYYCARDYSGEFSGYDFESWGEGLTVTVSS     | 108 |
| 13124-8992_15884_7 | TITAYMELSSLRSEDTAVYYCARDYYRGEFSGDYAFESWGQGT L VTVSS  | 108 |
| 13124-3212_15270_7 | TNTAYMELSSLRSEDTAVYYCARDYYRGEFSGYDFESWGQGT L VTVSS   | 108 |
| 13124-3308_14663_7 | TNTAYMELSSLRSEDTAVYYCARDYYRGEFSGYDFESWGQGT L VTVSS   | 108 |
| 13124-0627_16815_7 | TNTAYMELSSLRSEDTAVYYCARDYYRGEFSGYDFESWGQGT L VTVSS   | 108 |
| 13124-0069_17021_7 | TSTAFMVLSSLRSEDTAVYYCARDYYRGEFSGYEFDSWGPGLTVTVSS     | 108 |
| 13124-5431_14383_7 | TNTAYMELSSLRSEDTAVYYCARDYYRGEFSGYDFESWGQGT L VTVSS   | 108 |
| 13124-2788_17401_7 | TNTAYMELSSLRSEDTAVYYCARDYYRGEFSGYDFESWGQGT L VTVSS   | 108 |
| 13124-13091_7899_7 | TNTAYMELSSLRSEDTAVYYCARDYYRGEFSGYDFESWGQGT L VTVSS   | 108 |
| 13124-7844_12713_7 | TNTAYMELSSLRSEDTAVYYCARDYYRGEFSGYDFESWGQGT L VTVSS   | 108 |
| 13124-9626_17094_7 | TSTAYMELSSLRSEDTAVYYCARDYYRGEFSGVYDFESWGQGT L VTVSS  | 108 |
| 13124-4257_18254_7 | TITAYMG LSSLRSEDTAVYYCARDYYRGEFSGDYAFESWGQGT M VTVSS | 108 |
| 13124-2825_14799_7 | TNTAYMELSSLRSEDTAVYYCARDYYRGEFSGYDFESWGQGT L VTVSS   | 108 |
| 13124-9341_15546_7 | TNTAYMELSSLRSEDTAVYYCARDYYRGEFSGYDFESWGQGT L VTVSS   | 108 |
| 13124_5533_6283_7  | TITAYMELSSLRSEDTAVYYCARDYYRGEFSGDYAFESLGGGT L VTVSS  | 108 |
| 13124-13282_9736_7 | TNTAYMELSSLRSEDTAVYYCARDYYRGEFSGYDFESWGQGT L VTVSS   | 108 |
| 13124-2363_16799_7 | TNTAYMELSSLRSEDTAVYYCARDYYRGEFSGYDFESWGQGT L VTVSS   | 108 |
| 13124-6005_15313_7 | TNTAYMELSSLRSEDTAVYYCARDYYRGEFSGYDFESWGQGT L VTVSS   | 108 |

13124-9318\_3741\_7 TNTAYMELVSSLRSEDTAVYYCARDYYGGEFSGYDFESWGQGT LVTVSS 108  
13124-6621\_21899\_7 TNTAYMELSSLRSEDTAVYYCARDYYRGEFSGYDFESWGQGT LVTVSS 108  
13124-5600\_22783\_7 TTTAYMELSSLRSEDTAVYYCARDYYRGEFSDYAFESWARREPWSPSPQ 108  
13124-2369\_18623\_7 TNTAYMELSSLRSEDTAVYYCARDYYRGEFSGYDFESWGQGT LVTVSS 108  
13124-11115\_8100\_7 TNTAYMELSSLRSEDTAVYYCARDYYRGEFSGYDFESWGQGT LVTVSS 108  
13124-5412\_14379\_7 TNTAYMELSSLRSEDTAVYYGARDYYRGEFSGYDFESWGQGT LVTVSS 108  
13124-3393\_15271\_7 TSTAFMVLSSLRSEDTAVYYCARDYYRGEFSGYEFDSWGPGL LVTVSS 108  
13124-5261\_22336\_7 TNTAYMELSSLRSEDTAVYYCARDYYRGEFSGYDFESWGQGT LVTVSS 108  
13124-6633\_21883\_7 TNTAYMELSSLRSEDTAVYYCARDYYRGEFSGYDFESWGQGT LVTVSS 108  
13124-3864\_23299\_7 TNTAYMDLSSLRSEDTAVYYCARDYYRGEFSGYDFESWGQGT RVTVSS 108  
13124-15325\_2660\_7 TNTAYMELSSLRSEDTAVYYCARDYYRGEFSGYDFESWGQGT LVTVSS 108  
13124-5953\_20855\_7 TNTAYMELSSLRSEDTAVYYCARDYYRGEFSGYDFESWGQGT LVTVSS 108  
13124-1994\_10960\_7 TSTAFMVLSSLRSEDTAVYYCARDYYRGEFSGYEFDSWGPGL LVTVSS 108  
13124-14093\_8682\_7 TNTAYMELSSLRSEDTAVYYCARGHYRGEFSGYDFESWGQGT LVTVSS 108  
13124-6875\_19742\_7 TTTAYMELSSLRSEDTAVYYCARDYYRGEFSDYAFESWGQGT LVTVSS 108  
13124-0152\_20100\_7 TNTAYMELSSLRSEDTAVYYCASDHYRGEFSGYDFESWGQGT LVTVSS 108  
13124-7427\_9819\_7 TNTAYMELVSSLRSEDTAVYYCARDYYGGEFSGYDFESWGQGT LVTVSS 108  
13124-1170\_11174\_7 TNTAYMELSSLRSEDTAVYYCARDYYRGEFSGYDFESWGQGT LVTVSS 108  
13124-0112\_10007\_7 TTTAYMELSSLRSEDTAVYYCARDYYRGEFSDYAFESWGQGT LVTVSS 107  
13124-0644\_22215\_7 TSTAFMVLSSLRSEDTAVYYCARDYYRGEFSGYEFDSWGPGL LVTVSS 108  
13124-10680\_5800\_7 TSTAFMVLSSLRSEDTAVYYCARDYYRGEFSGYEFDSWGPGL LVTVSS 108  
13124-1335\_12762\_7 TNTAYVELSSLRSEDTAVYYCARDYYRGEFSGYDFESWGQGT LVTVSS 108  
13124-6480\_14906\_7 TNTAYMELSSLRSEDTAVYYCARDYYRGEFSGYDFESWGQGT LVTVSS 108  
13124-9619\_15184\_7 TSTAFMVLSSLRSEDTAVYYCARDYYRGEFSGYEFDSWGPGL LVTVSS 108  
13124-8510\_23327\_7 TNTAYMELSSLRSEDTAVYYCARDYYRGEFSGYDFESWGQGT LVTVSS 108  
13124-7637\_10676\_7 TNTAYMELSSLRSEDTAVYYCARDYYRGEFSGYDFESWGQGT LVTVSS 108  
13124-9005\_19868\_7 TNTAYMELSSLRSEDTAVYYCARDYYGGEFSGYDFESWGQGT LVTVSS 108  
13124-6121\_19672\_7 TNTAYMELSSLRSEDTAVYYCARDYYRGEFSGYDFESWGQGT LVTVSS 108  
13124-3435\_11203\_7 TNTAYMELSSLRSEDTAVYYCARDYYRGEFSGYDFESWGQGT LVTVSS 108  
13124-6582\_9947\_7 TNTAYMELSSLRSEDTAVYYCARDYYRGEFSGYDFESWGQGT LVTVSS 108  
13124-6431\_22711\_7 TSTAFMVLSSLRSEDTAVYYCARDYYRGEFSGYEFDSWGPGL LVTVSS 108  
13124-1655\_14573\_7 TNTAYMELSSLRSEDTAVYYCARDYYRGEFSGYDFESWGQGT LVTVSS 108  
13124-9956\_15283\_7 TNTAYMELGSLRSEDTAVYYCARDYYRGE LSGYDFESWGQGT LVTVSS 108  
13124-6539\_7943\_7 TSTAFMVLSSLRSEDTAVYYCARDYYRGEFSGYEFDSWGPGL LVTVSS 108  
13124-5113\_23035\_7 TSTAFMVLSSLRSEDTAVYYCARDYYRGEFSGYEFDSWGPGL LVTVSS 108  
13124-2646\_10466\_7 TSTAFMVLSSLRSEDTAVYYCARDYYRGEFSGYEFDSWGPGL LVTVSS 108  
13124-2009\_10951\_7 TSTAFMVLSSLRSEDTAVYYCARDYYRGEFSGYEFDSWGPGL LVTVSS 108  
13124-9577\_12166\_7 TNTDYLEVSR L T SEDTA IYYC TRDYRGEFSGYDFESWGQGT LVTVSS 108  
13124-9099\_7882\_7 TSTAFMVLSSLRSEDTAVYYCARDYYRGEFSGYEFDSWGPGL LVTVSS 108  
13124-13289\_8683\_7 TNTAYMELSSLRSEDTAVYYCARDYYRGEFSGYDFESWGQGT LVTVSS 108  
13124-3751\_15933\_7 TSTAFMVLSSLRSEDTAVYYCARDYYRGEFSGYEFDSWGPGL LVTVSS 108  
13124-0093\_19171\_7 TNTAYMELSSLRSEDTAVYYCARDYYRGEFSGYDFESWGQGT LVTVSS 108  
13124-1133\_12137\_7 TNTAYMELSSLRSEDTAVYYCARDYYRGEFSGYDFESWGQGT LVTVSS 108  
13124-6262\_20261\_7 TNTAYMELSSLRSEDTAVYYCARDYYRGEFSGYDFESWGQGT LVTVSS 108  
13124-2302\_16661\_7 TNTAYMELSSLRSEDTAVYYCARDYYRGEFSGYDFESWGQGT LVTVSS 107  
13124-5920\_9696\_7 TNTAYMELSSLRSEDTAVYYCARDYYRGEFSGYDFESWGQGT LVTVSS 108  
13124-3239\_9156\_7 TNTAYMELSSLRSEDTAVYYCARDYYRGEFSGYDFESWGQGT LVTVSS 108  
13124-6793\_11592\_7 TNTAYMELSSLRSEDTAVYYCARDYYRGEFSGYDFESWGQGT LVTVSS 108  
13124-7842\_13580\_7 TNTAYMELSSLRSEDTAVYYCARDYYRGEFSGYDFESWGQGT LVTVSS 108  
13124-4115\_7313\_7 TNTAYMELSSLRSEDTAVYYCARDYYRGEFSGYDFESWGQGT LVTVSS 108  
13124-2764\_15933\_7 TNTAYMELSSLRSEDTAVYYCARDYYRGEFSGYDFESWGQGT LVTVSS 108  
13124-4814\_16906\_7 TNTAYMELSSLRSEDTAVYYCARDYYRGEFSGYDFESWGQGT LVTVSS - 107  
13124-12894\_8455\_7 TTTAYMELSSLRSEDTAVYYCARDYYRGEFSDYAFESWGQGT LVTVSS 108  
13124-4021\_10214\_7 TNTAYMELVSSLRSEDTAVYYCARDYHSGEFSGYDFESWGQGT LVTVSS 108  
13124-14652\_6376\_7 TNTAYMELSSLRSEDTAVYYCARDYYRGEFSGYDFESWGQGT LVTVSS 108  
13124-1934\_15415\_7 TTTAYMELSSLRSEDTAVYYCARDYYRGEFSDYAFESRGGGT LVTVSS 108  
13124-4075\_21379\_7 TNTAYMELSSLRSEGTAVYYCARDYYRGEFSGYDFESWGQGT LVTVSS 108  
13124-1819\_23558\_7 TNTAYMELSSLRSEDTAVYYCARDYYRGEFSGYDFESWGQGT LVTVSS 108  
13124-1674\_19239\_7 TNTAYMELSSLRSEDTAVYYCARDYYRGEFSGYDFESWGQGT LVTVSS 106  
13124-5141\_14947\_7 TNTAYMELSSLRSEDTAVYYCARDYYRGEFSGYDFESWGQGT LVTVSS 108  
13124-8320\_22493\_7 TNTAYMELSSLRSEDTAVYYCARDYYRGEFSGYDFESWGRGT LVTSPQ 108  
13124-9273\_20388\_7 TNTAYMELSSLRSEDTAVYYCARDYYRGEFSGYDFESWGQGT LVTVSS 108  
13124-11434\_5872\_7 TNTAYLELSSLRSEDTAVYYCARDHYGGEFSGYDFESWGQGT LVTVSS 104  
13124-6982\_17104\_7 TSTAFMMLSSLRSEDTAVYYCARDYYRGEFSGYEFDSWGPGL LVTVSS 108  
13124-11455\_8079\_7 TSTAFMVLSSLRSEDTAVYYCARDYYRGEFSGYEFDSWGPGL LVTVSS 108  
13124-2646\_15030\_7 TSTAYMELSSLRSEDTAVYYCARDYYRGEFSGYDFESWGQGT LVTVSS 108  
13124-8583\_19748\_7 TSTAYMELSSLRSEDTAVYYCARDYYRGEFSGYDFESWGQGT LVT - - 105  
13124-5500\_4716\_7 TNTAYMELSSLRSEDTAVYYCARDYYRGEFSGYDFESWGQGT LVTVSS 108  
13124-10551\_5365\_7 TCTAFMVLSSLRSEDTAVYYCARDYYRGEFSGYEFDSWGPGL LVTVSS 108  
13124-5687\_11081\_7 TSTAYMELSSLRSDDTAVYYCVRDYRGEFSGYDFESWGQGT LVTVSS 108  
13124-9986\_6754\_7 TSTAFMVLSSLRSEDTAVYYCARDYYRGEFSGYEFDSWGPGL LVTVSS 108  
13124-5131\_14932\_7 TNTAYMELSSLRSEDTAVYYCARDYYRGEFSGYDFESWGQGT LVTVSS 108  
13124-4630\_13426\_7 TNTAYMELSSLRSEDTAVYYCARDYYRGEFSGYDFESWGQGT LVTVSS 108  
13124-0784\_12259\_7 TTTAYMELSSLRSEDTAVYYCARDYYRGEFSDYAFESRGGGT LVTVSS 108  
13124-13894\_9673\_7 TSTAFMVLSSLRSEDTAVYYCARDYYRGEFSGYEFDSWGPGL LVTVSS 108  
13124-3199\_9372\_7 TNTAYMELSSLRSEDTAVYYCARDYYRGEFSGYDFESWGQGT LVTVSS 108

|                    |                                                                                                                                                |     |
|--------------------|------------------------------------------------------------------------------------------------------------------------------------------------|-----|
| 13124-5824_17565_7 | T <b>T</b> TAYMELSSLR <b>S</b> ADTAVYYCARDYYRGEF <b>S</b> D <b>Y</b> AFESWGQGT <b>L</b> VT <b>R</b> L <b>L</b>                                 | 108 |
| 13124-11447_8278_7 | TNTAYMELSSLRSEDTAVYYCARDYYRGEFSGYDFESWGQGT <b>L</b> VT <b>V</b> SS                                                                             | 108 |
| 13124-8718_8350_7  | TNTAYMELSSLRSEDTAVYYCARDYYRGEFSGYDFESWGQGT <b>L</b> VT <b>V</b> SS                                                                             | 108 |
| 13124-1669_14663_7 | TNTAYMELSSLRSEDTAVYYCARDYYRGEFSGYDFESWGQGT <b>L</b> VT <b>V</b> SS                                                                             | 108 |
| 13124-11149_8008_7 | TNTAYMELSSLRSEDTAVYYC <b>S</b> RDYYRGEFSGYDFESWGQGT <b>L</b> VT - -                                                                            | 105 |
| 13124-2846_11434_7 | T <b>S</b> T <b>A</b> F <b>M</b> <b>V</b> LSSLRSEDTAVYYCARDYYRGEFSGY <b>E</b> F <b>D</b> SWG <b>P</b> GT <b>L</b> VT <b>V</b> SS               | 108 |
| 13124-2687_15585_7 | T <b>S</b> TAYMELSSLRSEDTAVYYCARDYYRGEFSGYDFESWGQGT <b>L</b> VT <b>V</b> SS                                                                    | 108 |
| 13124-5358_9258_7  | TNTAYMELSSLRSEDTAVYYCARDYYRGEFSGYDFESWGQGT <b>L</b> VT <b>V</b> SS                                                                             | 108 |
| 13124-2107_10523_7 | TNTAYMELSSLRSEDTAVYYCARDYYRGEFSGYDFESWGQGT <b>L</b> VT <b>V</b> SS                                                                             | 108 |
| 13124-2427_12231_7 | T <b>T</b> TAYMELSSLRSEDTAVYYCARDYYRGEF <b>S</b> D <b>Y</b> AF <b>S</b> R <b>D</b> QGT <b>L</b> VT <b>V</b> SS                                 | 108 |
| 13124-9497_21934_7 | TNTAYM <b>E</b> VSSLRSEDTAVYYCARDYY <b>G</b> GEFSGYDFESWGQGT <b>L</b> VT <b>V</b> SS                                                           | 108 |
| 13124-5247_11941_7 | TNTAYMELSSLRSEDTAVYYCARDYYRGEFSGYDFESWGQGT <b>L</b> VT <b>V</b> SS                                                                             | 108 |
| 13124-7283_4084_7  | TNTAYMELSSLRSEDTAVYYC <b>A</b> R <b>D</b> <b>H</b> <b>Y</b> <b>G</b> GEFSGYDFESWGQGT <b>L</b> VT <b>V</b> SS                                   | 108 |
| 13124-6630_11242_7 | TNTAYMELSSLRSEDTAVYYCARDYYRGEFSGYDFESWGQGT <b>L</b> VT <b>V</b> SS                                                                             | 108 |
| 13124-0220_19398_7 | TNTAYMELSSLRSEDTAVYYCARDYYRGEFSGYDFESWGQGT <b>L</b> VT <b>V</b> SS                                                                             | 108 |
| 13124-6751_12818_7 | TNTAYMELSSLRSEDTAVYYCARDYYRGEFSGYDFESWGQGT <b>L</b> VT <b>V</b> SS                                                                             | 108 |
| 13124-2649_11192_7 | TNTAY <b>L</b> ELSSLRSEDTAVYYCARDYYRGEFSGYDFESWGQGT <b>L</b> VT <b>V</b> SS                                                                    | 108 |
| 13124-9530_21220_7 | T <b>S</b> T <b>A</b> F <b>M</b> <b>V</b> LSSLRSEDTAVYYCARDYYRGEFSGY <b>E</b> F <b>D</b> SWG <b>P</b> GT <b>L</b> VT <b>V</b> SS               | 108 |
| 13124-0172_13235_7 | T <b>T</b> TAYMELSSLRSEDTAVYYCARDYYRGEF <b>S</b> D <b>Y</b> AF <b>S</b> <b>L</b> GQGT <b>L</b> VT <b>V</b> SS                                  | 108 |
| 13124-2789_9174_7  | T <b>T</b> TAYMELSSLRSEDTAVYYCARDYYRGEF <b>S</b> D <b>Y</b> AF <b>S</b> WGQGT <b>L</b> VT <b>V</b> SS                                          | 108 |
| 13124-3398_11605_7 | T <b>T</b> TAYMELSSLRSEDTAVYYCARDYYRGEF <b>S</b> D <b>Y</b> AF <b>S</b> <b>S</b> GQGT <b>L</b> VT <b>V</b> SS                                  | 108 |
| 13124-2079_14429_7 | T <b>T</b> TAYMELSSLRSEDTAVYYCARDYYRGEF <b>S</b> D <b>Y</b> AF <b>S</b> WGQGT <b>L</b> VT <b>V</b> SS                                          | 108 |
| 13124-3706_11235_7 | TNTAYMELSSLRSEDTAVYYCARDYYRGEFSGYDFESWGQGT <b>L</b> VT <b>V</b> SS                                                                             | 108 |
| 13124-7945_8135_7  | TNTAYMELSSLRSEDTAVYYCARDYYRGEFSGYDFESWGQGT <b>L</b> VT <b>V</b> SS                                                                             | 108 |
| 13124-5742_4672_7  | TNTAYMELSS <b>L</b> <b>V</b> <b>P</b> EDTAVY <b>F</b> C <b>A</b> <b>S</b> <b>D</b> <b>H</b> YRGEFSGYDFESWGQGT <b>L</b> VT <b>V</b> SS          | 108 |
| 13124-4242_12552_7 | TNTAYMELSSLRSEDTAVYYCARDYYRGEFSGYDFESWGQGT <b>L</b> VT <b>V</b> SS                                                                             | 108 |
| 13124-4022_12442_7 | TNTAYMELSSLRSEDTAVYYCARDYYRGEFSGYDFESWGQGT <b>L</b> VT <b>V</b> SS                                                                             | 108 |
| 13124-3434_17111_7 | TNTAYMELSSLRSEDTAVYYCARDYYRGEFSGYDFESWGQGT <b>L</b> VT <b>V</b> SS                                                                             | 108 |
| 13124-5155_16928_7 | TNTAYM <b>E</b> VSSLRSEDTAVYYCARDYY <b>S</b> <b>D</b> EFSGYDFESWGQGT <b>L</b> VT <b>V</b> SS                                                   | 108 |
| 13124-9502_14439_7 | TNTAYMELSSLRSEDTAVYYCARDYYRGEFSGYDFESWGQGT <b>L</b> VT <b>V</b> SS                                                                             | 108 |
| 13124-4887_19093_7 | T <b>T</b> TAYMELSSLRSEDTAVYYCARDYYRGEF <b>S</b> D <b>Y</b> AF <b>S</b> <b>G</b> GQGT <b>L</b> VT <b>V</b> SS                                  | 108 |
| 13124-7862_18760_7 | TNTAYMELSSLRSEDTAVYYCARDYYRGEFSGYDFESWGQGT <b>L</b> VT <b>V</b> SS                                                                             | 108 |
| 13124-9420_11732_7 | TNTAYMELSSLRSEDTAVYYCARDYYRGEFSGYDFESWGQGT <b>L</b> VT <b>V</b> SS                                                                             | 108 |
| 13124-5327_11154_7 | TNTAYMELSSLRSEDTAVYYCARDYYRGEFSGYDFESWGQGT <b>L</b> VT <b>V</b> SS                                                                             | 108 |
| 13124-7222_19833_7 | TNTAYMELSSLRSEDTAVYYCARDYYRGEFSGYDFESWGQGT <b>L</b> VT <b>V</b> SS                                                                             | 108 |
| 13124-6620_22193_7 | TNTAYMELSSLRSEDTAVYYCARDYYRGEFSGYDFESWGQGT <b>L</b> VT <b>V</b> SS                                                                             | 108 |
| 13124-7778_16183_7 | TNTAYMELSSLRSEDTAVYYCARDYYRGEFSGYDFESWGQGT <b>L</b> VT <b>V</b> SS                                                                             | 108 |
| 13124-8010_16995_7 | T <b>S</b> T <b>A</b> F <b>M</b> <b>V</b> LSSLRSEDTAVYYCARDYYRGEFSGY <b>E</b> F <b>D</b> SWG <b>P</b> GT <b>L</b> VT <b>V</b> SS               | 108 |
| 13124-10630_5219_7 | T <b>S</b> T <b>A</b> F <b>M</b> <b>V</b> LSSLRSEDTAVYYCARDYYRGEFSGY <b>E</b> F <b>D</b> SWG <b>P</b> GT <b>L</b> VT <b>V</b> SS               | 108 |
| 13124-4923_16041_7 | TNTAYMELSSLRSEDTAVYYCARDYYRGEFSGYDFESWGQGT <b>L</b> VT <b>V</b> SS                                                                             | 108 |
| 13124-9997_20587_7 | TNTAYMELSSLRSEDTAVYYCARDYYRGEFSGYDFESWGQGT <b>L</b> VT <b>V</b> SS                                                                             | 108 |
| 13124-7237_18302_7 | TNT <b>A</b> <b>N</b> <b>L</b> ELSSLRSEDTAV <b>D</b> Y <b>C</b> A <b>R</b> <b>D</b> <b>H</b> <b>D</b> RGEFSGYDFESWGQGT <b>L</b> VT <b>V</b> SS | 108 |
| 13124-3515_14854_7 | T <b>S</b> T <b>A</b> F <b>M</b> <b>V</b> LSSLRSEDTAVYYCARDYYRGEFSGY <b>E</b> F <b>D</b> SWG <b>P</b> GT <b>L</b> VT <b>V</b> SS               | 108 |
| 13136-9104_15300_6 | TNTAYMELSSLRSEDTAVYYC <b>A</b> R <b>V</b> <b>H</b> YRGEFSGYDFESWGQGT <b>L</b> VT <b>V</b> SS                                                   | 108 |
